# Supplementary material for: Children at onset of type 1 diabetes show altered N-glycosylation of plasma proteins and IgG
Source: PubMed Central journal article supplement (PMC9283363; doi:10.1007/s00125-022-05703-8), 2022-05-27
Supplement: 125_2022_5703_MOESM1_ESM.pdf [file 125_2022_5703_MOESM1_ESM.pdf]

**ESM Table 1** General description of the IgG glycan peaks

| Glycan peak | Glycan structure <sup>a</sup> | Glycan description <sup>b</sup>                                                          |
|-------------|-------------------------------|------------------------------------------------------------------------------------------|
| GP1         | FA1                           | core fucosylated, monantennary                                                           |
| GP2         | A2                            | biantennary                                                                              |
| GP3         | A2B                           | biantennary with bisecting GlcNAc                                                        |
| GP4         | FA2                           | core fucosylated, biantennary                                                            |
| GP5         | M5<br>FA2                     | high-mannose<br>core fucosylated, biantennary                                            |
| GP6         | FA2B                          | core fucosylated, biantennary with bisecting GlcNAc                                      |
| GP7         | A2[3]G1<br>FA2B               | monogalactosylated, biantennary<br>core fucosylated, biantennary with bisecting GlcNAc   |
| GP8         | FA2[6]G1                      | core fucosylated, monogalactosylated, biantennary                                        |
| GP9         | FA2[3]G1                      | core fucosylated, monogalactosylated, biantennary                                        |
| GP10        | FA2[6]BG1                     | core fucosylated, monogalactosylated, biantennary with bisecting GlcNAc                  |
| GP11        | FA2[3]BG1                     | core fucosylated, monogalactosylated, biantennary with bisecting GlcNAc                  |
| GP12        | A2G2                          | digalactosylated, biantennary                                                            |
| GP13        | A2BG2                         | digalactosylated, biantennary with bisecting GlcNAc                                      |
| GP14        | FA2G2                         | core fucosylated, digalactosylated, biantennary                                          |
| GP15        | FA2BG2                        | core fucosylated, digalactosylated, biantennary with bisecting GlcNAc                    |
| GP16        | FA2[3]G1S1                    | core fucosylated, monogalactosylated and monosialylated, biantennary                     |
| GP17        | A2G2S1                        | digalactosylated and monosialylated, biantennary                                         |
| GP18        | FA2G2S1                       | core fucosylated, digalactosylated and monosialylated, biantennary                       |
| GP19        | FA2BG2S1                      | core fucosylated, digalactosylated and monosialylated, biantennary with bisecting GlcNAc |
| GP20        | not determined                |                                                                                          |
| GP21        | A2G2S2                        | digalactosylated and disialylated, biantennary                                           |
| GP22        | A2BG2S2                       | digalactosylated and disialylated, biantennary with bisecting GlcNAc                     |
| GP23        | FA2G2S2                       | core fucosylated, digalactosylated and disialylated, biantennary                         |
| GP24        | FA2BG2S2                      | core fucosylated, digalactosylated and disialylated, biantennary with bisecting GlcNAc   |

<sup>a</sup>The most abundant glycan structure in glycan peak

<sup>b</sup>The description relates to the percentage of that glycan in total IgG N-glycans.

Structure abbreviations: all N-glycans have two core GlcNAcs; F at the start of the abbreviation indicates a core fucose  $\alpha$ 1,6-linked to the inner GlcNAc; Mx indicates the number of mannose residues on core GlcNAcs; Ax indicates the number of antenna (GlcNAc) on the trimannosyl core; A2, biantennary with both GlcNAcs as  $\beta$ 1,2-linked; B, bisecting GlcNAc linked  $\beta$ 1,4 to  $\beta$ 1,3-mannose; Gx indicates the number of  $\beta$ 1,4-linked galactose residues on the antenna; Sx indicates the number of sialic acids linked to galactose. (Pučić et al, Mol. Cell Proteomics, 2011, 10, M111.010090)

**ESM Table 2** General description of the plasma glycan peaks

| Glycan peak | Glycan structure <sup>a</sup> | Glycan description <sup>b</sup>                                                         |
|-------------|-------------------------------|-----------------------------------------------------------------------------------------|
| GP1         | FA2                           | core fucosylated, biantennary                                                           |
| GP2         | FA2B                          | core fucosylated, biantennary with bisecting GlcNAc                                     |
| GP3         | A2BG1                         | monogalactosylated, biantennary with bisecting GlcNAc                                   |
| GP4         | FA2[6]G1                      | core fucosylated and monogalactosylated, biantennary                                    |
| GP5         | FA2[3]G1                      | core fucosylated and monogalactosylated, biantennary                                    |
| GP6         | FA2[6]BG1                     | core fucosylated and monogalactosylated, biantennary with bisecting GlcNAc              |
| GP7         | M6                            | high-mannose                                                                            |
| GP8         | A2G2                          | digalactosylated, biantennary                                                           |
| GP9         | A2BG2                         | digalactosylated, biantennary with bisecting GlcNAc                                     |
| GP10        | FA2G2                         | core fucosylated, digalactosylated, biantennary                                         |
| GP11        | FA2BG2                        | core fucosylated, digalactosylated, biantennary with bisecting GlcNAc                   |
| GP12        | M7<br>A2G2S1                  | high-mannose<br>digalactosylated, monosialylated, biantennary                           |
| GP13        | FA2G1S1                       | core fucosylated, monogalactosylated and monosialylated biantennary                     |
| GP14        | A2G2S1                        | digalactosylated and monosialylated biantennary                                         |
| GP15        | A2BG2S1                       | digalactosylated and monosialylated biantennary with bisecting GlcNAc                   |
| GP16        | FA2G2S1                       | core fucosylated, digalactosylated and monosialylated biantennary                       |
| GP17        | FA2BG2S1                      | core fucosylated, digalactosylated and monosialylated biantennary with bisecting GlcNAc |
| GP18        | A2G2S2                        | digalactosylated and disialylated biantennary                                           |
| GP19        | M9                            | high-mannose                                                                            |
| GP20        | A2G2S2                        | digalactosylated and disialylated biantennary                                           |
| GP21        | A2G2S2                        | digalactosylated and disialylated biantennary                                           |



|      |   |   |   |   |   |   |   |   |   |
|------|---|---|---|---|---|---|---|---|---|
| GP2  | 1 | 0 | 0 | 0 | 0 | 0 | 0 | 0 | 0 |
| GP3  | 0 | 0 | 0 | 0 | 0 | 0 | 0 | 0 | 0 |
| GP4  | 1 | 0 | 0 | 0 | 0 | 0 | 0 | 1 | 0 |
| GP5  | 0 | 0 | 0 | 0 | 0 | 0 | 0 | 0 | 1 |
| GP6  | 1 | 0 | 0 | 0 | 0 | 0 | 1 | 1 | 0 |
| GP7  | 0 | 1 | 0 | 1 | 0 | 0 | 0 | 0 | 0 |
| GP8  | 0 | 1 | 0 | 1 | 0 | 0 | 0 | 1 | 0 |
| GP9  | 0 | 1 | 0 | 1 | 0 | 0 | 0 | 1 | 0 |
| GP10 | 0 | 1 | 0 | 1 | 0 | 0 | 1 | 1 | 0 |
| GP11 | 0 | 1 | 0 | 1 | 0 | 0 | 1 | 1 | 0 |
| GP12 | 0 | 0 | 1 | 1 | 0 | 0 | 0 | 0 | 0 |
| GP13 | 0 | 0 | 1 | 1 | 0 | 0 | 1 | 0 | 0 |
| GP14 | 0 | 0 | 1 | 1 | 0 | 0 | 0 | 1 | 0 |
| GP15 | 0 | 0 | 1 | 1 | 0 | 0 | 1 | 1 | 0 |
| GP16 | 0 | 1 | 0 | 0 | 1 | 0 | 0 | 1 | 0 |
| GP17 | 0 | 0 | 1 | 0 | 1 | 0 | 0 | 0 | 0 |
| GP18 | 0 | 0 | 1 | 0 | 1 | 0 | 0 | 1 | 0 |
| GP19 | 0 | 0 | 1 | 0 | 1 | 0 | 1 | 1 | 0 |
| GP20 | 0 | 0 | 0 | 0 | 0 | 0 | 0 | 0 | 0 |
| GP21 | 0 | 0 | 1 | 0 | 0 | 1 | 0 | 0 | 0 |
| GP22 | 0 | 0 | 1 | 0 | 0 | 1 | 1 | 0 | 0 |
| GP23 | 0 | 0 | 1 | 0 | 0 | 1 | 0 | 1 | 0 |
| GP24 | 0 | 0 | 1 | 0 | 0 | 1 | 1 | 1 | 0 |

GO, agalactosylated glycans; G1, monogalactosylated glycans; G2, digalactosylated glycans; S0, asialylated glycans; S1, monosialylated glycans; S2, disialylated glycans; B, glycans with bisecting *N*-acetylglucosamine (GlcNAc); CF, glycans with core fucose; HM, high-mannose glycans; 0, glycan peak (GP) area is not included in the calculation; 1, GP area is included in total in the calculation

**ESM Table 4** Calculation of the plasma derived traits

| Glycan peak | LB | HB | G0 | G1 | G2 | G3 | G4 | S1 | S2 | S3 | S4 | B | AF | CF | HM |
|-------------|----|----|----|----|----|----|----|----|----|----|----|---|----|----|----|
| GP1         | 1  | 0  | 1  | 0  | 0  | 0  | 0  | 0  | 0  | 0  | 0  | 0 | 0  | 1  | 0  |
| GP2         | 1  | 0  | 1  | 0  | 0  | 0  | 0  | 0  | 0  | 0  | 0  | 1 | 0  | 1  | 0  |
| GP3         | 1  | 0  | 0  | 1  | 0  | 0  | 0  | 0  | 0  | 0  | 0  | 1 | 0  | 0  | 0  |
| GP4         | 1  | 0  | 0  | 1  | 0  | 0  | 0  | 0  | 0  | 0  | 0  | 0 | 0  | 1  | 0  |
| GP5         | 1  | 0  | 0  | 1  | 0  | 0  | 0  | 0  | 0  | 0  | 0  | 0 | 0  | 1  | 0  |
| GP6         | 1  | 0  | 0  | 1  | 0  | 0  | 0  | 0  | 0  | 0  | 0  | 1 | 0  | 1  | 0  |
| GP7         | 0  | 0  | 0  | 0  | 0  | 0  | 0  | 0  | 0  | 0  | 0  | 0 | 0  | 0  | 1  |
| GP8         | 1  | 0  | 0  | 0  | 1  | 0  | 0  | 0  | 0  | 0  | 0  | 0 | 0  | 0  | 0  |
| GP9         | 1  | 0  | 0  | 0  | 1  | 0  | 0  | 0  | 0  | 0  | 0  | 1 | 0  | 0  | 0  |
| GP10        | 1  | 0  | 0  | 0  | 1  | 0  | 0  | 0  | 0  | 0  | 0  | 0 | 0  | 1  | 0  |
| GP11        | 1  | 0  | 0  | 0  | 1  | 0  | 0  | 0  | 0  | 0  | 0  | 1 | 0  | 1  | 0  |

|      |     |   |   |   |     |   |   |     |   |   |   |   |   |   |     |
|------|-----|---|---|---|-----|---|---|-----|---|---|---|---|---|---|-----|
| GP12 | 0.5 | 0 | 0 | 0 | 0.5 | 0 | 0 | 0.5 | 0 | 0 | 0 | 0 | 0 | 0 | 0.5 |
| GP13 | 1   | 0 | 0 | 1 | 0   | 0 | 0 | 1   | 0 | 0 | 0 | 0 | 0 | 1 | 0   |
| GP14 | 1   | 0 | 0 | 0 | 1   | 0 | 0 | 1   | 0 | 0 | 0 | 0 | 0 | 0 | 0   |
| GP15 | 1   | 0 | 0 | 0 | 1   | 0 | 0 | 1   | 0 | 0 | 0 | 1 | 0 | 0 | 0   |
| GP16 | 1   | 0 | 0 | 0 | 1   | 0 | 0 | 1   | 0 | 0 | 0 | 0 | 0 | 1 | 0   |
| GP17 | 1   | 0 | 0 | 0 | 1   | 0 | 0 | 1   | 0 | 0 | 0 | 1 | 0 | 1 | 0   |
| GP18 | 1   | 0 | 0 | 0 | 1   | 0 | 0 | 0   | 1 | 0 | 0 | 0 | 0 | 0 | 0   |
| GP19 | 0   | 0 | 0 | 0 | 0   | 0 | 0 | 0   | 0 | 0 | 0 | 0 | 0 | 0 | 1   |
| GP20 | 1   | 0 | 0 | 0 | 1   | 0 | 0 | 0   | 1 | 0 | 0 | 0 | 0 | 0 | 0   |
| GP21 | 1   | 0 | 0 | 0 | 1   | 0 | 0 | 0   | 1 | 0 | 0 | 0 | 0 | 0 | 0   |
| GP22 | 1   | 0 | 0 | 0 | 1   | 0 | 0 | 0   | 1 | 0 | 0 | 0 | 0 | 1 | 0   |
| GP23 | 1   | 0 | 0 | 0 | 1   | 0 | 0 | 0   | 1 | 0 | 0 | 1 | 0 | 1 | 0   |
| GP24 | 0   | 1 | 0 | 0 | 0   | 1 | 0 | 0   | 1 | 0 | 0 | 0 | 0 | 0 | 0   |
| GP25 | 0   | 1 | 0 | 0 | 0   | 1 | 0 | 0   | 1 | 0 | 0 | 0 | 0 | 0 | 0   |
| GP26 | 0   | 1 | 0 | 0 | 0   | 1 | 0 | 0   | 1 | 0 | 0 | 0 | 0 | 0 | 0   |
| GP27 | 0   | 1 | 0 | 0 | 0   | 1 | 0 | 0   | 1 | 0 | 0 | 0 | 1 | 0 | 0   |
| GP28 | 0   | 1 | 0 | 0 | 0   | 1 | 0 | 0   | 0 | 1 | 0 | 0 | 0 | 0 | 0   |
| GP29 | 0   | 1 | 0 | 0 | 0   | 1 | 0 | 0   | 0 | 1 | 0 | 0 | 0 | 0 | 0   |
| GP30 | 0   | 1 | 0 | 0 | 0   | 1 | 0 | 0   | 0 | 1 | 0 | 0 | 0 | 0 | 0   |
| GP31 | 0   | 1 | 0 | 0 | 0   | 1 | 0 | 0   | 0 | 1 | 0 | 0 | 0 | 1 | 0   |
| GP32 | 0   | 1 | 0 | 0 | 0   | 1 | 0 | 0   | 0 | 1 | 0 | 0 | 0 | 0 | 0   |
| GP33 | 0   | 1 | 0 | 0 | 0   | 1 | 0 | 0   | 0 | 1 | 0 | 0 | 1 | 0 | 0   |
| GP34 | 0   | 1 | 0 | 0 | 0   | 1 | 0 | 0   | 0 | 1 | 0 | 0 | 0 | 1 | 0   |
| GP35 | 0   | 1 | 0 | 0 | 0   | 1 | 0 | 0   | 0 | 1 | 0 | 0 | 1 | 1 | 0   |
| GP36 | 0   | 1 | 0 | 0 | 0   | 0 | 1 | 0   | 0 | 1 | 0 | 0 | 0 | 0 | 0   |
| GP37 | 0   | 1 | 0 | 0 | 0   | 0 | 1 | 0   | 0 | 0 | 1 | 0 | 0 | 0 | 0   |
| GP38 | 0   | 1 | 0 | 0 | 0   | 0 | 1 | 0   | 0 | 0 | 1 | 0 | 0 | 0 | 0   |
| GP39 | 0   | 1 | 0 | 0 | 0   | 0 | 1 | 0   | 0 | 0 | 1 | 0 | 1 | 0 | 0   |

LB, low branched glycans; HB, highly branched glycans; G0, agalactosylated glycans; G1, monogalactosylated glycans; G2, digalactosylated glycans; G3, tragalactosylated glycans; G4, tetragalactosylated glycans; S1, monosialylated glycans; S2, disialylated glycans; S3, trisialylated glycans; S4, tetrasialylated glycans; B, glycans with bisecting *N*-acetylglucosamine (GlcNAc); AF, glycans with antennary fucose; CF, glycans with core fucose; HM, high-mannose glycans; 0, glycan peak (GP) area is not included in the calculation; 0.5, half of the GP area is included in the calculation; 1, GP area is included in total in the calculation

**ESM Table 5** Descriptive statistics of plasma and IgG *N*-glycans quantified in children with type 1 diabetes in the primary study

| Glycan peak              | Q1   | Median | Q3   |
|--------------------------|------|--------|------|
| Plasma <i>N</i> -glycans |      |        |      |
| GP1                      | 3.85 | 4.64   | 5.7  |
| GP2                      | 1.75 | 1.96   | 2.21 |

|      |       |       |       |
|------|-------|-------|-------|
| GP3  | 0.03  | 0.04  | 0.05  |
| GP4  | 3.95  | 4.69  | 5.38  |
| GP5  | 1.5   | 1.86  | 2.21  |
| GP6  | 0.84  | 0.99  | 1.17  |
| GP7  | 1.02  | 1.1   | 1.2   |
| GP8  | 1.76  | 1.94  | 2.11  |
| GP9  | 0.06  | 0.08  | 0.09  |
| GP10 | 4.5   | 5.1   | 5.77  |
| GP11 | 0.61  | 0.73  | 0.87  |
| GP12 | 1.48  | 1.61  | 1.75  |
| GP13 | 0.37  | 0.44  | 0.51  |
| GP14 | 14.49 | 15.36 | 16.23 |
| GP15 | 0.19  | 0.22  | 0.25  |
| GP16 | 5.61  | 6.16  | 6.79  |
| GP17 | 1.08  | 1.38  | 1.75  |
| GP18 | 3.26  | 3.65  | 4.07  |
| GP19 | 0.72  | 0.78  | 0.84  |
| GP20 | 24.88 | 26.25 | 27.7  |
| GP21 | 0.39  | 0.43  | 0.46  |
| GP22 | 3.24  | 3.73  | 4.28  |
| GP23 | 0.95  | 1.18  | 1.47  |
| GP24 | 1.48  | 1.72  | 2     |
| GP25 | 0.06  | 0.07  | 0.09  |
| GP26 | 1.2   | 1.41  | 1.64  |
| GP27 | 0.55  | 0.72  | 0.92  |
| GP28 | 0.45  | 0.53  | 0.62  |
| GP29 | 0.05  | 0.07  | 0.09  |
| GP30 | 3.48  | 4.02  | 4.72  |
| GP31 | 0.23  | 0.29  | 0.37  |
| GP32 | 0.83  | 1     | 1.19  |
| GP33 | 1.77  | 2.19  | 2.67  |
| GP34 | 0.21  | 0.25  | 0.29  |
| GP35 | 0.11  | 0.15  | 0.2   |
| GP36 | 0.27  | 0.31  | 0.36  |
| GP37 | 0.28  | 0.36  | 0.45  |
| GP38 | 0.58  | 0.68  | 0.8   |
| GP39 | 0.36  | 0.44  | 0.54  |
| AF   | 2.84  | 3.52  | 4.31  |
| B    | 5.81  | 6.7   | 7.72  |
| CF   | 31.22 | 34.39 | 37.43 |
| G0   | 5.73  | 6.65  | 7.83  |
| G1   | 6.93  | 8.09  | 9.21  |
| G2   | 66.82 | 68.36 | 69.87 |

|               |       |       |       |
|---------------|-------|-------|-------|
| G3            | 11.26 | 12.55 | 14.08 |
| G4            | 1.57  | 1.81  | 2.08  |
| HB            | 12.93 | 14.31 | 16.05 |
| HM            | 3.31  | 3.51  | 3.73  |
| LB            | 81.81 | 83.57 | 84.97 |
| S1            | 24.38 | 25.32 | 26.24 |
| S2            | 38    | 39.51 | 41.04 |
| S3            | 7.99  | 8.87  | 10.02 |
| S4            | 1.28  | 1.5   | 1.73  |
| IgG N-glycans |       |       |       |
| GP1           | 0.07  | 0.08  | 0.1   |
| GP2           | 0.15  | 0.22  | 0.34  |
| GP3           | 0.08  | 0.1   | 0.11  |
| GP4           | 18.63 | 21.54 | 24.53 |
| GP5           | 0.11  | 0.13  | 0.15  |
| GP6           | 3.14  | 3.72  | 4.37  |
| GP7           | 0.11  | 0.16  | 0.23  |
| GP8           | 19.8  | 20.96 | 22.13 |
| GP9           | 7.53  | 8.43  | 9.34  |
| GP10          | 3.06  | 3.56  | 4.11  |
| GP11          | 0.35  | 0.41  | 0.47  |
| GP12          | 0.2   | 0.31  | 0.48  |
| GP13          | 0.13  | 0.15  | 0.17  |
| GP14          | 15.09 | 16.99 | 18.85 |
| GP15          | 1.05  | 1.22  | 1.44  |
| GP16          | 2.3   | 2.55  | 2.81  |
| GP17          | 0.61  | 0.69  | 0.78  |
| GP18          | 9.99  | 11.47 | 13.04 |
| GP19          | 1.28  | 1.47  | 1.71  |
| GP20          | 0.18  | 0.21  | 0.24  |
| GP21          | 0.49  | 0.55  | 0.61  |
| GP22          | 0.07  | 0.08  | 0.1   |
| GP23          | 2.04  | 2.38  | 2.77  |
| GP24          | 1.31  | 1.52  | 1.77  |
| B             | 11    | 12.33 | 13.78 |
| CF            | 96.71 | 97.26 | 97.73 |
| G0            | 22.36 | 25.66 | 29.08 |
| G1            | 34.75 | 36.39 | 37.92 |
| G2            | 33.65 | 37.23 | 40.93 |
| S0            | 50.28 | 52.57 | 54.83 |
| S1            | 14.74 | 16.24 | 17.93 |
| S2            | 4.06  | 4.57  | 5.15  |

AF, glycans with antennary fucose; B, glycans with bisecting *N*-acetylglucosamine (GlcNAc); CF, glycans with core fucose; G0, agalactosylated glycans; G1, monogalactosylated glycans; G2, digalactosylated glycans; G3, tragalactosylated glycans; G4, tetragalactosylated glycans; HB, highly branched glycans; HM, high-mannose glycans; LB, low branched glycans; S1, monosialylated glycans; S2, disialylated glycans; S3, trisialylated glycans; S4, tetrasialylated glycans

**ESM Table 6** Descriptive statistics of plasma *N*-glycans quantified in the follow-up family-based study

| Control |       |       |       |       |       | Ctrl <sub>1</sub> | Ctrl <sub>2</sub> | Cases |       |       |       |       |
|---------|-------|-------|-------|-------|-------|-------------------|-------------------|-------|-------|-------|-------|-------|
| GP      | Med   | Q1    | Q3    | Min   | Max   | Area              | Area              | Med   | Q1    | Q3    | Min   | Max   |
| GP1     | 4.53  | 3.66  | 5.36  | 1.5   | 11.59 | 3.89              | 3.06              | 4.62  | 3.71  | 5.81  | 2.02  | 9.6   |
| GP2     | 1.74  | 1.58  | 1.94  | 1.03  | 3.48  | 1.62              | 1.03              | 1.92  | 1.71  | 2.17  | 1.19  | 3     |
| GP3     | 0.05  | 0.04  | 0.07  | 0.03  | 0.13  | 0.07              | 0.03              | 0.05  | 0.04  | 0.06  | 0.02  | 0.12  |
| GP4     | 5.02  | 4.46  | 5.57  | 2.62  | 8.35  | 3.67              | 3.33              | 4.65  | 3.86  | 5.21  | 2.46  | 7.19  |
| GP5     | 2.05  | 1.79  | 2.35  | 0.85  | 3.53  | 1.24              | 1.37              | 1.86  | 1.49  | 2.21  | 0.81  | 3.29  |
| GP6     | 1.06  | 0.92  | 1.24  | 0.47  | 2.31  | 0.78              | 0.47              | 1.01  | 0.87  | 1.18  | 0.55  | 1.84  |
| GP7     | 1.05  | 0.94  | 1.15  | 0.59  | 1.54  | 0.79              | 0.73              | 1.08  | 0.99  | 1.19  | 0.79  | 1.57  |
| GP8     | 2     | 1.83  | 2.19  | 1.34  | 3     | 2.18              | 1.95              | 2.03  | 1.88  | 2.18  | 1.38  | 2.71  |
| GP9     | 0.1   | 0.09  | 0.12  | 0.05  | 0.19  | 0.09              | 0.05              | 0.1   | 0.09  | 0.11  | 0.05  | 0.15  |
| GP10    | 5.43  | 4.97  | 5.91  | 3.37  | 8.82  | 4.17              | 3.37              | 4.93  | 4.45  | 5.51  | 3.1   | 7.99  |
| GP11    | 0.83  | 0.71  | 0.98  | 0.37  | 1.68  | 0.54              | 0.37              | 0.81  | 0.69  | 0.99  | 0.39  | 1.68  |
| GP12    | 1.48  | 1.36  | 1.65  | 1.03  | 2.04  | 1.56              | 1.23              | 1.6   | 1.47  | 1.74  | 1.09  | 2.19  |
| GP13    | 0.58  | 0.48  | 0.68  | 0.27  | 1.12  | 0.31              | 0.41              | 0.54  | 0.45  | 0.64  | 0.27  | 0.97  |
| GP14    | 14.7  | 13.96 | 15.42 | 11.78 | 17.77 | 16.23             | 15.64             | 15.06 | 14.3  | 15.77 | 12.11 | 17.58 |
| GP15    | 0.42  | 0.38  | 0.46  | 0.27  | 0.69  | 0.31              | 0.3               | 0.42  | 0.38  | 0.45  | 0.28  | 0.6   |
| GP16    | 6.27  | 5.72  | 6.81  | 4.22  | 8.66  | 4.88              | 4.88              | 6.1   | 5.63  | 6.74  | 4.46  | 9.01  |
| GP17    | 1.55  | 1.32  | 1.88  | 0.8   | 3.61  | 0.83              | 0.8               | 1.59  | 1.31  | 2     | 0.69  | 3.46  |
| GP18    | 3.61  | 3.35  | 4.02  | 2.61  | 5.24  | 4.23              | 3.44              | 3.73  | 3.4   | 4.13  | 2.46  | 5.72  |
| GP19    | 0.99  | 0.94  | 1.06  | 0.56  | 1.23  | 0.98              | 0.8               | 0.99  | 0.95  | 1.06  | 0.76  | 1.21  |
| GP20    | 24.18 | 23.04 | 25.33 | 18.54 | 29.84 | 27.96             | 29.1              | 24.35 | 23.12 | 25.74 | 18.89 | 30.75 |
| GP21    | 0.54  | 0.5   | 0.58  | 0.39  | 0.69  | 0.59              | 0.55              | 0.56  | 0.53  | 0.6   | 0.43  | 0.72  |
| GP22    | 3.35  | 3.03  | 3.7   | 2.33  | 5.86  | 2.78              | 3.54              | 3.52  | 3.14  | 3.97  | 2.04  | 5.38  |
| GP23    | 1.26  | 1.06  | 1.48  | 0.52  | 2.74  | 0.77              | 0.89              | 1.31  | 1.07  | 1.54  | 0.65  | 2.87  |



|           |      |       |           |           |       |       |       |       |       |           |       |       |
|-----------|------|-------|-----------|-----------|-------|-------|-------|-------|-------|-----------|-------|-------|
| GP2<br>4  | 1.88 | 1.67  | 2.24      | 1.21      | 3.52  | 2.23  | 1.82  | 1.85  | 1.59  | 2.17      | 1.23  | 3.43  |
| GP2<br>5  | 0.18 | 0.17  | 0.19      | 0.13      | 0.24  | 0.19  | 0.19  | 0.19  | 0.18  | 0.21      | 0.13  | 0.31  |
| GP2<br>6  | 1.67 | 1.51  | 1.9       | 1.03      | 3     | 1.84  | 1.87  | 1.65  | 1.47  | 1.88      | 1.12  | 2.88  |
| GP2<br>7  | 0.83 | 0.7   | 1.01      | 0.15      | 1.56  | 1.18  | 1.49  | 0.86  | 0.7   | 1.03      | 0.14  | 1.97  |
| GP2<br>8  | 0.63 | 0.55  | 0.72      | 0.16      | 1.31  | 0.71  | 0.62  | 0.64  | 0.54  | 0.72      | 0.41  | 1.24  |
| GP2<br>9  | 0.19 | 0.17  | 0.22      | 0.04      | 0.32  | 0.23  | 0.26  | 0.21  | 0.19  | 0.24      | 0.11  | 0.37  |
| GP3<br>0  | 4.16 | 3.74  | 4.85      | 2.59      | 7.46  | 5.01  | 4.94  | 4.05  | 3.54  | 4.81      | 2.58  | 7.53  |
| GP3<br>1  | 0.36 | 0.3   | 0.42      | 0.19      | 1.05  | 0.35  | 0.4   | 0.36  | 0.31  | 0.45      | 0.2   | 0.75  |
| GP3<br>2  | 0.98 | 0.85  | 1.14      | 0.59      | 1.77  | 1.15  | 1.62  | 0.93  | 0.82  | 1.1       | 0.54  | 1.79  |
| GP3<br>3  | 2    | 1.66  | 2.44      | 0.48      | 4.05  | 2.96  | 4.05  | 2.09  | 1.69  | 2.53      | 0.57  | 4.62  |
| GP3<br>4  | 0.33 | 0.3   | 0.37      | 0.2       | 0.5   | 0.37  | 0.44  | 0.34  | 0.3   | 0.39      | 0.18  | 0.64  |
| GP3<br>5  | 0.25 | 0.21  | 0.29      | 0.13      | 0.5   | 0.31  | 0.44  | 0.27  | 0.23  | 0.32      | 0.12  | 0.56  |
| GP3<br>6  | 0.5  | 0.46  | 0.56      | 0.32      | 0.93  | 0.63  | 0.93  | 0.51  | 0.47  | 0.58      | 0.3   | 0.96  |
| GP3<br>7  | 0.45 | 0.38  | 0.51      | 0.24      | 0.77  | 0.6   | 0.67  | 0.45  | 0.38  | 0.53      | 0.24  | 1.15  |
| GP3<br>8  | 0.81 | 0.73  | 0.91      | 0.45      | 1.61  | 1.08  | 1.61  | 0.82  | 0.73  | 0.93      | 0.46  | 1.72  |
| GP3<br>9  | 0.57 | 0.46  | 0.67      | 0.27      | 1.57  | 0.79  | 1.57  | 0.57  | 0.49  | 0.7       | 0.27  | 1.36  |
| HB<br>9   | 16.0 | 14.77 | 17.7<br>7 | 11.3<br>1 | 23.2  | 19.62 | 22.91 | 15.7  | 14.47 | 17.9<br>4 | 9.84  | 25.27 |
| <b>HM</b> | 3.56 | 3.32  | 3.78      | 2.19      | 4.29  | 3.33  | 2.75  | 3.67  | 3.47  | 3.89      | 2.9   | 4.71  |
| LB<br>7   | 81.7 | 80.13 | 83.0<br>8 | 75.4<br>1 | 86.7  | 78.7  | 75.82 | 82.02 | 79.87 | 83.3<br>6 | 72.6  | 87.28 |
| S1<br>4   | 25.1 | 24.29 | 26.1<br>1 | 21.0<br>4 | 29.1  | 24.13 | 23.26 | 25.46 | 24.52 | 26.4<br>9 | 21.7  | 29.5  |
| S2<br>9   | 37.7 | 36.69 | 39.0<br>6 | 31.6<br>2 | 42.9  | 41.77 | 42.9  | 38.37 | 36.81 | 39.8<br>7 | 33.51 | 44.26 |
| S3        | 9.52 | 8.78  | 10.5<br>9 | 6.51      | 13.83 | 11.72 | 13.69 | 9.44  | 8.52  | 10.6<br>6 | 5.67  | 15.5  |
| S4        | 1.82 | 1.62  | 2.07      | 1         | 3.85  | 2.46  | 3.85  | 1.87  | 1.63  | 2.09      | 1.01  | 3.76  |
| AF        | 3.63 | 3.04  | 4.42      | 1.16      | 7.54  | 5.24  | 7.54  | 3.77  | 3.14  | 4.51      | 1.11  | 8.42  |
| <b>B</b>  | 7.01 | 6.43  | 8.05      | 3.95      | 11.44 | 5.01  | 3.95  | 7.29  | 6.46  | 8.35      | 3.83  | 12.03 |
| CF<br>3   | 35.4 | 32.69 | 37.7<br>7 | 22.7<br>2 | 46.92 | 26.51 | 24.8  | 34.81 | 31.78 | 37.5<br>4 | 22.86 | 44.41 |

|           |       |       |       |       |       |       |       |       |       |       |       |       |
|-----------|-------|-------|-------|-------|-------|-------|-------|-------|-------|-------|-------|-------|
| G0        | 6.33  | 5.35  | 7.24  | 3.01  | 15.06 | 5.51  | 4.09  | 6.61  | 5.4   | 7.87  | 3.21  | 12.07 |
| <b>G1</b> | 8.95  | 7.84  | 9.8   | 4.8   | 14.4  | 6.06  | 5.6   | 8.13  | 7     | 9.24  | 4.32  | 12.67 |
| G2        | 66.29 | 64.86 | 67.65 | 58.35 | 71.86 | 67.12 | 66.13 | 66.79 | 65.35 | 68.22 | 60.79 | 71.17 |
| G3        | 13.67 | 12.54 | 15.28 | 9.45  | 20.49 | 16.53 | 18.13 | 13.34 | 12.2  | 15.25 | 8.52  | 21.89 |
| G4        | 2.31  | 2.09  | 2.64  | 1.33  | 4.78  | 3.1   | 4.78  | 2.38  | 2.11  | 2.64  | 1.32  | 4.72  |

Bolded are derived glycan traits that significantly differed between healthy and diseased siblings.

Ctrl<sub>1</sub>, control sample of individual that developed type 1 diabetes within nearly 6 years; Ctrl<sub>2</sub>, control sample of individual that developed type 1 diabetes within 9 years; GP, glycan peak; Med, median; AF, glycans with antennary fucose; B, glycans with bisecting *N*-acetylglucosamine (GlcNAc); CF, glycans with core fucose; G0, agalactosylated glycans; G1, monogalactosylated glycans; G2, digalactosylated glycans; G3, tragalactosylated glycans; G4, tetragalactosylated glycans; HB, highly branched glycans; HM, high-mannose glycans; LB, low branched glycans; S0, asialylated glycans; S1, monosialylated glycans; S2, disialylated glycans; S3, trisialylated glycans; S4, tetrasialylated glycans

**ESM Table 7** Descriptive statistics of IgG *N*-glycans quantified in the follow-up family-based study

| Control |       |       |       |       |       | Ctrl <sub>1</sub> | Ctrl <sub>2</sub> | Cases |       |       |       |       |
|---------|-------|-------|-------|-------|-------|-------------------|-------------------|-------|-------|-------|-------|-------|
| GP      | Med   | Q1    | Q3    | Min   | Max   | Area              | Area              | Med   | Q1    | Q3    | Min   | Max   |
| GP1     | 0.09  | 0.07  | 0.1   | 0.04  | 0.21  | 0.1               | 0.09              | 0.09  | 0.07  | 0.1   | 0.04  | 0.4   |
| GP2     | 0.24  | 0.18  | 0.35  | 0.07  | 1.09  | 0.43              | 0.23              | 0.25  | 0.16  | 0.39  | 0.06  | 0.98  |
| GP3     | 0.14  | 0.12  | 0.17  | 0.07  | 0.28  | 0.13              | 0.11              | 0.14  | 0.12  | 0.17  | 0.08  | 0.29  |
| GP4     | 19.69 | 16.64 | 22.41 | 9.08  | 35.05 | 22.42             | 20.53             | 21.06 | 17.94 | 24.17 | 11.45 | 33.89 |
| GP5     | 0.17  | 0.15  | 0.19  | 0.1   | 0.34  | 0.25              | 0.11              | 0.18  | 0.16  | 0.21  | 0.12  | 0.36  |
| GP6     | 3.38  | 2.9   | 3.86  | 1.65  | 7.77  | 3.79              | 2.25              | 3.82  | 3.2   | 4.4   | 1.94  | 6.97  |
| GP7     | 0.22  | 0.16  | 0.3   | 0.07  | 0.91  | 0.27              | 0.17              | 0.21  | 0.15  | 0.28  | 0.06  | 0.85  |
| GP8     | 22.15 | 21.1  | 23.57 | 16.39 | 26    | 21.67             | 23.3              | 21.05 | 20.03 | 22.34 | 17.11 | 25.38 |
| GP9     | 8.61  | 7.91  | 9.36  | 5.57  | 12.18 | 7.28              | 9.27              | 8.29  | 7.37  | 9.11  | 5.43  | 11.48 |
| GP10    | 3.7   | 3.25  | 4.26  | 1.89  | 7.62  | 3.67              | 2.15              | 3.74  | 3.23  | 4.38  | 2.15  | 6.92  |
| GP11    | 0.43  | 0.39  | 0.49  | 0.26  | 0.75  | 0.43              | 0.27              | 0.46  | 0.42  | 0.52  | 0.29  | 0.79  |
| GP12    | 0.44  | 0.31  | 0.68  | 0.1   | 3.33  | 0.52              | 0.36              | 0.4   | 0.28  | 0.61  | 0.14  | 2.08  |
| GP13    | 0.25  | 0.22  | 0.29  | 0.15  | 0.53  | 0.26              | 0.2               | 0.24  | 0.22  | 0.28  | 0.16  | 0.45  |
| GP14    | 17.51 | 15.61 | 19.32 | 10.22 | 25.88 | 17.73             | 17.11             | 17.02 | 14.93 | 19.09 | 9.9   | 26.4  |
| GP15    | 1.26  | 1.07  | 1.5   | 0.56  | 2.35  | 1.18              | 0.72              | 1.31  | 1.13  | 1.54  | 0.78  | 2.31  |
| GP16    | 2.67  | 2.42  | 2.93  | 1.65  | 3.79  | 2.29              | 3.19              | 2.62  | 2.42  | 2.83  | 1.78  | 3.59  |
| GP17    | 0.74  | 0.65  | 0.84  | 0.49  | 1.67  | 0.76              | 0.69              | 0.74  | 0.66  | 0.85  | 0.5   | 1.57  |

|           |       |       |       |       |       |       |       |       |       |       |       |       |
|-----------|-------|-------|-------|-------|-------|-------|-------|-------|-------|-------|-------|-------|
| GP18      | 11.3  | 9.87  | 12.72 | 6.42  | 19.3  | 11.12 | 13.28 | 10.96 | 9.72  | 12.6  | 6.66  | 18.34 |
| GP19      | 1.42  | 1.25  | 1.59  | 0.75  | 2.37  | 1.25  | 0.96  | 1.52  | 1.34  | 1.69  | 0.96  | 3.39  |
| GP20      | 0.25  | 0.21  | 0.29  | 0.11  | 0.55  | 0.24  | 0.26  | 0.26  | 0.22  | 0.31  | 0.11  | 0.66  |
| GP21      | 0.55  | 0.51  | 0.61  | 0.38  | 0.83  | 0.53  | 0.59  | 0.57  | 0.51  | 0.63  | 0.4   | 1.45  |
| GP22      | 0.17  | 0.15  | 0.19  | 0.09  | 0.31  | 0.16  | 0.17  | 0.18  | 0.15  | 0.21  | 0.08  | 0.49  |
| GP23      | 2.06  | 1.86  | 2.4   | 0.96  | 4.36  | 2     | 2.76  | 2.17  | 1.91  | 2.47  | 1.08  | 4.2   |
| GP24      | 1.35  | 1.2   | 1.55  | 0.7   | 2.24  | 1.25  | 1.03  | 1.5   | 1.32  | 1.75  | 0.86  | 2.5   |
| <b>S0</b> | 55.24 | 53.18 | 57.43 | 41.74 | 64.38 | 53.02 | 53.54 | 53.2  | 50.85 | 55.39 | 44.77 | 64.08 |
| S1        | 16.2  | 14.69 | 17.68 | 10.77 | 24.36 | 15.43 | 18.12 | 16.03 | 14.45 | 17.69 | 10.77 | 22.37 |
| <b>S2</b> | 4.22  | 3.81  | 4.6   | 2.67  | 7.15  | 3.93  | 4.55  | 4.44  | 4.03  | 5.01  | 2.54  | 7.43  |
| <b>B</b>  | 12.1  | 10.93 | 13.35 | 6.96  | 20.84 | 11.98 | 7.74  | 12.89 | 11.71 | 14.23 | 8.61  | 19.92 |
| CF        | 96.65 | 96    | 97.2  | 91.15 | 98.3  | 96.18 | 96.89 | 96.62 | 96.08 | 97.15 | 93.51 | 98.44 |
| G0        | 23.46 | 20.02 | 26.46 | 11.83 | 43.44 | 26.75 | 23.09 | 25.51 | 22.09 | 28.79 | 14.16 | 39.31 |
| <b>G1</b> | 38.47 | 37.05 | 39.58 | 31.56 | 42.39 | 35.62 | 38.34 | 36.49 | 35.2  | 38.13 | 30.27 | 40.86 |
| G2        | 37.61 | 33.94 | 41.19 | 23.55 | 50.91 | 36.76 | 37.87 | 36.91 | 33.07 | 41.15 | 22.96 | 48.84 |

Bolded are derived glycan traits that significantly differed between healthy and diseased siblings.

Ctrl<sub>1</sub>, control sample of individual that developed type 1 diabetes within nearly 6 years; Ctrl<sub>2</sub>, control sample of individual that developed type 1 diabetes within 9 years; GP, glycan peak; Med, median; B, glycans with bisecting *N*-acetylglucosamine (GlcNAc); CF, glycans with core fucose; G0, agalactosylated glycans; G1, monogalactosylated glycans; G2, digalactosylated glycans; S0, asialylated glycans; S1, monosialylated glycans; S2, disialylated glycans

**ESM Table 8** Correlation of plasma *N*-glycans with increase in number of specific autoantibodies (1–4)

| Glycan peak | Beta  | SE   | 95% CI <sub>low</sub> | 95% CI <sub>up</sub> | T value | <i>p</i> value          | <i>p</i> <sub>adj</sub> | <i>p</i> <sub>lab</sub> |
|-------------|-------|------|-----------------------|----------------------|---------|-------------------------|-------------------------|-------------------------|
| GP1         | 0.43  | 0.20 | 0.04                  | 0.82                 | 2.19    | 2.90 x 10 <sup>-2</sup> | 1                       |                         |
| GP2         | 0.54  | 0.19 | 0.16                  | 0.92                 | 2.82    | 5.09 x 10 <sup>-3</sup> | 1                       |                         |
| GP3         | -0.02 | 0.18 | -0.38                 | 0.33                 | -0.12   | 9.02 x 10 <sup>-1</sup> | 1                       |                         |
| GP4         | 0.43  | 0.19 | 0.05                  | 0.81                 | 2.23    | 2.63 x 10 <sup>-2</sup> | 1                       |                         |
| GP5         | 0.48  | 0.18 | 0.13                  | 0.84                 | 2.68    | 7.79 x 10 <sup>-3</sup> | 1                       |                         |
| GP6         | 0.49  | 0.18 | 0.13                  | 0.84                 | 2.68    | 7.76 x 10 <sup>-3</sup> | 1                       |                         |
| GP7         | 0.26  | 0.19 | -0.11                 | 0.64                 | 1.37    | 1.71 x 10 <sup>-1</sup> | 1                       |                         |

|      |       |      |       |       |       |                        |                       |     |
|------|-------|------|-------|-------|-------|------------------------|-----------------------|-----|
| GP8  | -0.09 | 0.20 | -0.47 | 0.30  | -0.43 | $6.66 \times 10^{-1}$  | 1                     |     |
| GP9  | 0.04  | 0.20 | -0.35 | 0.43  | 0.21  | $8.35 \times 10^{-1}$  | 1                     |     |
| GP10 | 0.37  | 0.20 | -0.02 | 0.76  | 1.87  | $6.31 \times 10^{-2}$  | 1                     |     |
| GP11 | 0.34  | 0.18 | -0.01 | 0.68  | 1.93  | $5.51 \times 10^{-2}$  | 1                     |     |
| GP12 | -0.01 | 0.19 | -0.38 | 0.35  | -0.06 | $9.55 \times 10^{-1}$  | 1                     |     |
| GP13 | 0.62  | 0.19 | 0.25  | 0.99  | 3.28  | $1.15 \times 10^{-3}$  | $4.35 \times 10^{-1}$ |     |
| GP14 | -0.22 | 0.20 | -0.61 | 0.16  | -1.13 | $2.59 \times 10^{-1}$  | 1                     |     |
| GP15 | 0.26  | 0.20 | -0.13 | 0.65  | 1.31  | $1.91 \times 10^{-1}$  | 1                     |     |
| GP16 | 0.54  | 0.20 | 0.16  | 0.93  | 2.77  | $6.01 \times 10^{-3}$  | 1                     |     |
| GP17 | 0.38  | 0.18 | 0.04  | 0.73  | 2.18  | $2.99 \times 10^{-2}$  | 1                     |     |
| GP18 | -0.51 | 0.17 | -0.85 | -0.16 | -2.89 | $4.20 \times 10^{-3}$  | 1                     |     |
| GP19 | -0.07 | 0.20 | -0.47 | 0.32  | -0.36 | $7.17E \times 10^{-1}$ | 1                     |     |
| GP20 | -0.28 | 0.20 | -0.67 | 0.11  | -1.42 | $1.58 \times 10^{-1}$  | 1                     |     |
| GP21 | -0.06 | 0.20 | -0.45 | 0.34  | -0.28 | $7.81 \times 10^{-1}$  | 1                     |     |
| GP22 | 0.40  | 0.19 | 0.02  | 0.77  | 2.06  | $4.02 \times 10^{-2}$  | 1                     |     |
| GP23 | 0.48  | 0.18 | 0.13  | 0.83  | 2.67  | $7.99 \times 10^{-3}$  | 1                     |     |
| GP24 | -0.87 | 0.19 | -1.24 | -0.50 | -4.65 | $5.23 \times 10^{-6}$  | $1.98 \times 10^{-3}$ | **  |
| GP25 | -0.50 | 0.20 | -0.89 | -0.12 | -2.56 | $1.10 \times 10^{-2}$  | 1                     |     |
| GP26 | -0.71 | 0.20 | -1.09 | -0.32 | -3.60 | $3.72 \times 10^{-4}$  | 1                     |     |
| GP27 | 0.27  | 0.20 | -0.12 | 0.65  | 1.35  | $1.77 \times 10^{-1}$  | 1                     |     |
| GP28 | -0.86 | 0.18 | -1.22 | -0.50 | -4.66 | $4.85 \times 10^{-6}$  | $1.83 \times 10^{-3}$ | **  |
| GP29 | -0.30 | 0.19 | -0.69 | 0.08  | -1.57 | $1.18 \times 10^{-1}$  | 1                     |     |
| GP30 | -0.93 | 0.19 | -1.30 | -0.56 | -4.99 | $1.07 \times 10^{-6}$  | $4.04 \times 10^{-4}$ | *** |
| GP31 | -0.52 | 0.20 | -0.91 | -0.13 | -2.63 | $8.93 \times 10^{-3}$  | 1                     |     |
| GP32 | -0.32 | 0.20 | -0.71 | 0.06  | -1.64 | $1.02 \times 10^{-1}$  | 1                     |     |
| GP33 | 0.13  | 0.19 | -0.26 | 0.51  | 0.65  | $5.13 \times 10^{-1}$  | 1                     |     |
| GP34 | -0.64 | 0.19 | -1.02 | -0.26 | -3.33 | $9.99 \times 10^{-4}$  | $3.78 \times 10^{-1}$ |     |
| GP35 | 0.22  | 0.20 | -0.17 | 0.61  | 1.13  | $2.59 \times 10^{-1}$  | 1                     |     |
| GP36 | -0.46 | 0.19 | -0.84 | -0.07 | -2.35 | $1.97 \times 10^{-2}$  | 1                     |     |
| GP37 | -0.78 | 0.18 | -1.13 | -0.42 | -4.34 | $1.98 \times 10^{-5}$  | $7.50 \times 10^{-3}$ | **  |
| GP38 | -0.66 | 0.18 | -1.02 | -0.30 | -3.58 | $4.05 \times 10^{-4}$  | $1.53 \times 10^{-1}$ |     |
| GP39 | -0.08 | 0.19 | -0.46 | 0.30  | -0.42 | $6.73 \times 10^{-1}$  | 1                     |     |
| LB   | 0.69  | 0.19 | 0.32  | 1.06  | 3.66  | $3.07 \times 10^{-4}$  | $1.16 \times 10^{-1}$ |     |
| HB   | -0.77 | 0.19 | -1.14 | -0.40 | -4.13 | $4.72 \times 10^{-5}$  | $1.79 \times 10^{-2}$ | *   |
| G0   | 0.46  | 0.20 | 0.08  | 0.85  | 2.36  | $1.90 \times 10^{-2}$  | 1                     |     |
| G1   | 0.53  | 0.19 | 0.16  | 0.90  | 2.80  | $5.49 \times 10^{-3}$  | 1                     |     |
| G2   | 0.11  | 0.20 | -0.28 | 0.50  | 0.55  | $5.81 \times 10^{-1}$  | 1                     |     |
| G3   | -0.79 | 0.19 | -1.15 | -0.42 | -4.19 | $3.76 \times 10^{-5}$  | $1.42 \times 10^{-2}$ | *   |
| G4   | -0.60 | 0.18 | -0.96 | -0.24 | -3.25 | $1.30 \times 10^{-3}$  | $4.93 \times 10^{-1}$ |     |
| S1   | 0.35  | 0.20 | -0.04 | 0.74  | 1.75  | $8.08 \times 10^{-2}$  | 1                     |     |
| S2   | -0.46 | 0.19 | -0.85 | -0.08 | -2.39 | $1.75 \times 10^{-2}$  | 1                     |     |
| S3   | -0.75 | 0.19 | -1.12 | -0.38 | -4.00 | $8.13 \times 10^{-5}$  | $3.07 \times 10^{-2}$ | *   |
| S4   | -0.60 | 0.18 | -0.96 | -0.24 | -3.28 | $1.15 \times 10^{-3}$  | $4.36 \times 10^{-1}$ |     |
| B    | 0.58  | 0.17 | 0.25  | 0.92  | 3.41  | $7.48 \times 10^{-4}$  | $2.83 \times 10^{-1}$ |     |
| AF   | 0.15  | 0.20 | -0.24 | 0.53  | 0.75  | $4.54 \times 10^{-1}$  | 1                     |     |
| CF   | 0.61  | 0.19 | 0.25  | 0.98  | 3.29  | $1.13 \times 10^{-3}$  | $4.27 \times 10^{-1}$ |     |

|    |      |      |       |      |      |                         |   |  |
|----|------|------|-------|------|------|-------------------------|---|--|
| HM | 0.10 | 0.20 | -0.29 | 0.49 | 0.50 | 6.16 x 10 <sup>-1</sup> | 1 |  |
|----|------|------|-------|------|------|-------------------------|---|--|

Beta, standard error, and 95% confidence interval are expressed in the standard deviation units, adjusted for age and gender. Significant associations are represented with a star sign within  $p_{lab}$  column.

LB, low branched glycans; HB, highly branched glycans; G0, agalactosylated glycans; G1, monogalactosylated glycans; G2, digalactosylated glycans; G3, trigalactosylated glycans; G4, tetragalactosylated glycans; S1, monosialylated glycans; S2, disialylated glycans; S3, trisialylated glycans; S4, tetrasialylated glycans; B, glycans with bisecting *N*-acetylglucosamine (GlcNAc); AF, glycans with antennary fucose; CF, glycans with core fucose; HM, high-mannose glycans;  $p_{adj}$ ,  $p$  value adjusted using Benjamini-Hochberg's method;  $p_{lab}$ , labels for significant  $p$  values,  $p_{value_{adj}} < 0.05$  (\*),  $p_{value_{adj}} < 0.01$  (\*\*),  $p_{value_{adj}} < 0.001$  (\*\*\*)

**ESM Table 9** Associations of plasma *N*-glycans with disease status, further adjusted for age and sex, and corrected for multiple testing

| Glycan | OR   | 95% CI     | SE   | $p$ value                     |
|--------|------|------------|------|-------------------------------|
| GP1    | 1.07 | 0.83, 1.39 | 0.14 | 7.93 x 10 <sup>-1</sup>       |
| GP2    | 2.09 | 1.58, 2.76 | 0.30 | <b>1.16 x 10<sup>-5</sup></b> |
| GP3    | 0.87 | 0.64, 1.19 | 0.14 | 6.27 x 10 <sup>-1</sup>       |
| GP4    | 0.60 | 0.46, 0.79 | 0.08 | <b>2.16 x 10<sup>-3</sup></b> |
| GP5    | 0.64 | 0.47, 0.86 | 0.10 | <b>1.32 x 10<sup>-2</sup></b> |
| GP6    | 0.97 | 0.73, 1.3  | 0.14 | 9.60 x 10 <sup>-1</sup>       |
| GP7    | 1.69 | 1.28, 2.24 | 0.24 | <b>2.01 x 10<sup>-3</sup></b> |
| GP8    | 1.03 | 0.8, 1.33  | 0.13 | 9.60 x 10 <sup>-1</sup>       |
| GP9    | 0.95 | 0.7, 1.27  | 0.14 | 9.19 x 10 <sup>-1</sup>       |
| GP10   | 0.57 | 0.43, 0.76 | 0.08 | <b>1.24 x 10<sup>-3</sup></b> |
| GP11   | 1.27 | 0.93, 1.75 | 0.21 | 2.92 x 10 <sup>-1</sup>       |
| GP12   | 1.86 | 1.37, 2.53 | 0.29 | <b>1.15 x 10<sup>-3</sup></b> |
| GP13   | 0.87 | 0.66, 1.14 | 0.12 | 5.16 x 10 <sup>-1</sup>       |
| GP14   | 1.18 | 0.91, 1.54 | 0.16 | 3.78 x 10 <sup>-1</sup>       |
| GP15   | 1.13 | 0.85, 1.49 | 0.16 | 6.27 x 10 <sup>-1</sup>       |
| GP16   | 1.01 | 0.78, 1.31 | 0.13 | 9.89 x 10 <sup>-1</sup>       |
| GP17   | 1.47 | 1.08, 2    | 0.23 | <b>5.04 x 10<sup>-2</sup></b> |
| GP18   | 1.04 | 0.79, 1.39 | 0.15 | 9.59 x 10 <sup>-1</sup>       |
| GP19   | 1.00 | 0.78, 1.29 | 0.13 | 9.89 x 10 <sup>-1</sup>       |
| GP20   | 0.98 | 0.76, 1.28 | 0.13 | 9.89 x 10 <sup>-1</sup>       |
| GP21   | 1.52 | 1.16, 1.98 | 0.21 | <b>8.56 x 10<sup>-3</sup></b> |
| GP22   | 1.74 | 1.32, 2.29 | 0.25 | <b>1.15 x 10<sup>-3</sup></b> |
| GP23   | 1.66 | 1.23, 2.25 | 0.26 | <b>5.61 x 10<sup>-3</sup></b> |
| GP24   | 0.79 | 0.61, 1.02 | 0.10 | 1.89 x 10 <sup>-1</sup>       |
| GP25   | 2.12 | 1.56, 2.87 | 0.33 | <b>4.54 x 10<sup>-5</sup></b> |
| GP26   | 0.82 | 0.63, 1.06 | 0.11 | 2.92 x 10 <sup>-1</sup>       |
| GP27   | 0.99 | 0.77, 1.29 | 0.13 | 9.89 x 10 <sup>-1</sup>       |
| GP28   | 0.97 | 0.74, 1.26 | 0.13 | 9.60 x 10 <sup>-1</sup>       |
| GP29   | 1.62 | 1.2, 2.19  | 0.25 | <b>7.12 x 10<sup>-3</sup></b> |
| GP30   | 0.72 | 0.55, 0.94 | 0.10 | 5.14 x 10 <sup>-2</sup>       |

|      |      |            |      |                               |
|------|------|------------|------|-------------------------------|
| GP31 | 1.20 | 0.92, 1.56 | 0.16 | 3.40 x 10 <sup>-1</sup>       |
| GP32 | 0.74 | 0.57, 0.96 | 0.10 | 7.91 x 10 <sup>-2</sup>       |
| GP33 | 1.00 | 0.77, 1.29 | 0.13 | 9.89 x 10 <sup>-1</sup>       |
| GP34 | 1.10 | 0.84, 1.43 | 0.15 | 7.23 x 10 <sup>-1</sup>       |
| GP35 | 1.30 | 0.99, 1.7  | 0.18 | 1.62 x 10 <sup>-1</sup>       |
| GP36 | 1.08 | 0.82, 1.41 | 0.15 | 7.93 x 10 <sup>-1</sup>       |
| GP37 | 0.86 | 0.65, 1.14 | 0.12 | 5.06 x 10 <sup>-1</sup>       |
| GP38 | 0.91 | 0.68, 1.2  | 0.13 | 7.23 x 10 <sup>-1</sup>       |
| GP39 | 0.97 | 0.74, 1.27 | 0.13 | 9.60 x 10 <sup>-1</sup>       |
| AF   | 1.01 | 0.78, 1.31 | 0.13 | 9.89 x 10 <sup>-1</sup>       |
| B    | 1.72 | 1.26, 2.34 | 0.27 | <b>3.52 x 10<sup>-3</sup></b> |
| CF   | 1.01 | 0.77, 1.32 | 0.14 | 9.89 x 10 <sup>-1</sup>       |
| G0   | 1.23 | 0.95, 1.6  | 0.16 | 2.73 x 10 <sup>-1</sup>       |
| G1   | 0.63 | 0.47, 0.84 | 0.09 | <b>7.01 x 10<sup>-3</sup></b> |
| G2   | 1.24 | 0.96, 1.6  | 0.16 | 2.61 x 10 <sup>-1</sup>       |
| G3   | 0.81 | 0.62, 1.05 | 0.11 | 2.73 x 10 <sup>-1</sup>       |
| G4   | 0.93 | 0.7, 1.23  | 0.13 | 7.93 x 10 <sup>-1</sup>       |
| HB   | 0.83 | 0.64, 1.08 | 0.11 | 3.32 x 10 <sup>-1</sup>       |
| HM   | 1.65 | 1.26, 2.16 | 0.23 | <b>2.16 x 10<sup>-3</sup></b> |
| LB   | 1.15 | 0.88, 1.5  | 0.15 | 5.07 x 10 <sup>-1</sup>       |
| S1   | 1.33 | 1.02, 1.72 | 0.18 | 9.92 x 10 <sup>-2</sup>       |
| S2   | 1.18 | 0.91, 1.54 | 0.16 | 3.78 x 10 <sup>-1</sup>       |
| S3   | 0.83 | 0.64, 1.08 | 0.11 | 3.32 x 10 <sup>-1</sup>       |
| S4   | 0.89 | 0.67, 1.19 | 0.13 | 6.60 x 10 <sup>-1</sup>       |

Significant *p* values (*p* < 0.05) are represented in bold.

LB, low branched glycans; HB, highly branched glycans; G0, agalactosylated glycans; G1, monogalactosylated glycans; G2, digalactosylated glycans; G3, trigalactosylated glycans; G4, tetragalactosylated glycans; S1, monosialylated glycans; S2, disialylated glycans; S3, trisialylated glycans; S4, tetrasialylated glycans; B, glycans with bisecting N-acetylglucosamine (GlcNAc); AF, glycans with antennary fucose; CF, glycans with core fucose; HM, high-mannose glycans

**ESM Table 10** Associations of IgG *N*-glycans with disease status, further adjusted for age and sex, and corrected for multiple testing

| Glycan | OR   | 95% CI     | SE   | <i>p</i> value                |
|--------|------|------------|------|-------------------------------|
| GP1    | 0.79 | 0.6, 1.04  | 0.11 | 1.57 x 10 <sup>-1</sup>       |
| GP2    | 1.15 | 0.88, 1.51 | 0.16 | 3.43 x 10 <sup>-1</sup>       |
| GP3    | 0.86 | 0.66, 1.12 | 0.12 | 3.43 x 10 <sup>-1</sup>       |
| GP4    | 1.25 | 0.95, 1.63 | 0.17 | 1.57 x 10 <sup>-1</sup>       |
| GP5    | 1.53 | 1.17, 1.99 | 0.21 | <b>3.89 x 10<sup>-3</sup></b> |
| GP6    | 1.71 | 1.31, 2.24 | 0.23 | <b>3.02 x 10<sup>-4</sup></b> |
| GP7    | 1.00 | 0.76, 1.31 | 0.14 | 9.73 x 10 <sup>-1</sup>       |
| GP8    | 0.40 | 0.3, 0.54  | 0.06 | <b>7.95 x 10<sup>-9</sup></b> |
| GP9    | 0.69 | 0.52, 0.93 | 0.10 | <b>2.73 x 10<sup>-2</sup></b> |

|      |      |            |      |                               |
|------|------|------------|------|-------------------------------|
| GP10 | 1.32 | 1, 1.74    | 0.19 | 8.64 x 10 <sup>-2</sup>       |
| GP11 | 1.90 | 1.43, 2.54 | 0.28 | <b>4.26 x 10<sup>-5</sup></b> |
| GP12 | 0.98 | 0.74, 1.3  | 0.14 | 9.64 x 10 <sup>-1</sup>       |
| GP13 | 1.01 | 0.77, 1.31 | 0.14 | 9.73 x 10 <sup>-1</sup>       |
| GP14 | 0.85 | 0.66, 1.1  | 0.11 | 2.97 x 10 <sup>-1</sup>       |
| GP15 | 2.09 | 1.52, 2.87 | 0.34 | <b>3.49 x 10<sup>-5</sup></b> |
| GP16 | 0.81 | 0.63, 1.05 | 0.11 | 1.57 x 10 <sup>-1</sup>       |
| GP17 | 1.41 | 1.07, 1.85 | 0.20 | <b>2.73 x 10<sup>-2</sup></b> |
| GP18 | 0.87 | 0.67, 1.13 | 0.11 | 3.43 x 10 <sup>-1</sup>       |
| GP19 | 2.91 | 2.09, 4.05 | 0.49 | <b>4.90 x 10<sup>-9</sup></b> |
| GP20 | 1.60 | 1.21, 2.1  | 0.22 | <b>2.29 x 10<sup>-3</sup></b> |
| GP21 | 1.69 | 1.28, 2.24 | 0.24 | <b>6.24 x 10<sup>-4</sup></b> |
| GP22 | 1.39 | 1.07, 1.81 | 0.19 | <b>2.73 x 10<sup>-2</sup></b> |
| GP23 | 1.24 | 0.95, 1.62 | 0.17 | 1.57 x 10 <sup>-1</sup>       |
| GP24 | 2.62 | 1.94, 3.54 | 0.40 | <b>4.90 x 10<sup>-9</sup></b> |
| B    | 2.16 | 1.61, 2.89 | 0.32 | <b>1.65 x 10<sup>-6</sup></b> |
| CF   | 0.80 | 0.6, 1.05  | 0.11 | 1.57 x 10 <sup>-1</sup>       |
| G0   | 1.34 | 1.02, 1.76 | 0.19 | 5.98 x 10 <sup>-2</sup>       |
| G1   | 0.37 | 0.27, 0.51 | 0.06 | <b>7.95 x 10<sup>-9</sup></b> |
| G2   | 1.02 | 0.78, 1.32 | 0.13 | 9.64 x 10 <sup>-1</sup>       |
| HM   | 1.53 | 1.17, 1.99 | 0.21 | <b>3.89 x 10<sup>-3</sup></b> |
| S0   | 0.50 | 0.37, 0.68 | 0.08 | <b>3.56 x 10<sup>-5</sup></b> |
| S1   | 0.98 | 0.76, 1.27 | 0.13 | 9.64 x 10 <sup>-1</sup>       |
| S2   | 1.86 | 1.41, 2.45 | 0.26 | <b>4.19 x 10<sup>-5</sup></b> |

Significant *p* values (*p* < 0.05) are represented in bold.

B, glycans with bisecting N-acetylglucosamine (GlcNAc); CF, glycans with core fucose; G0, agalactosylated glycans; G1, monogalactosylated glycans; G2, digalactosylated glycans; S0, asialylated glycans; S1, monosialylated glycans; S2, disialylated glycans

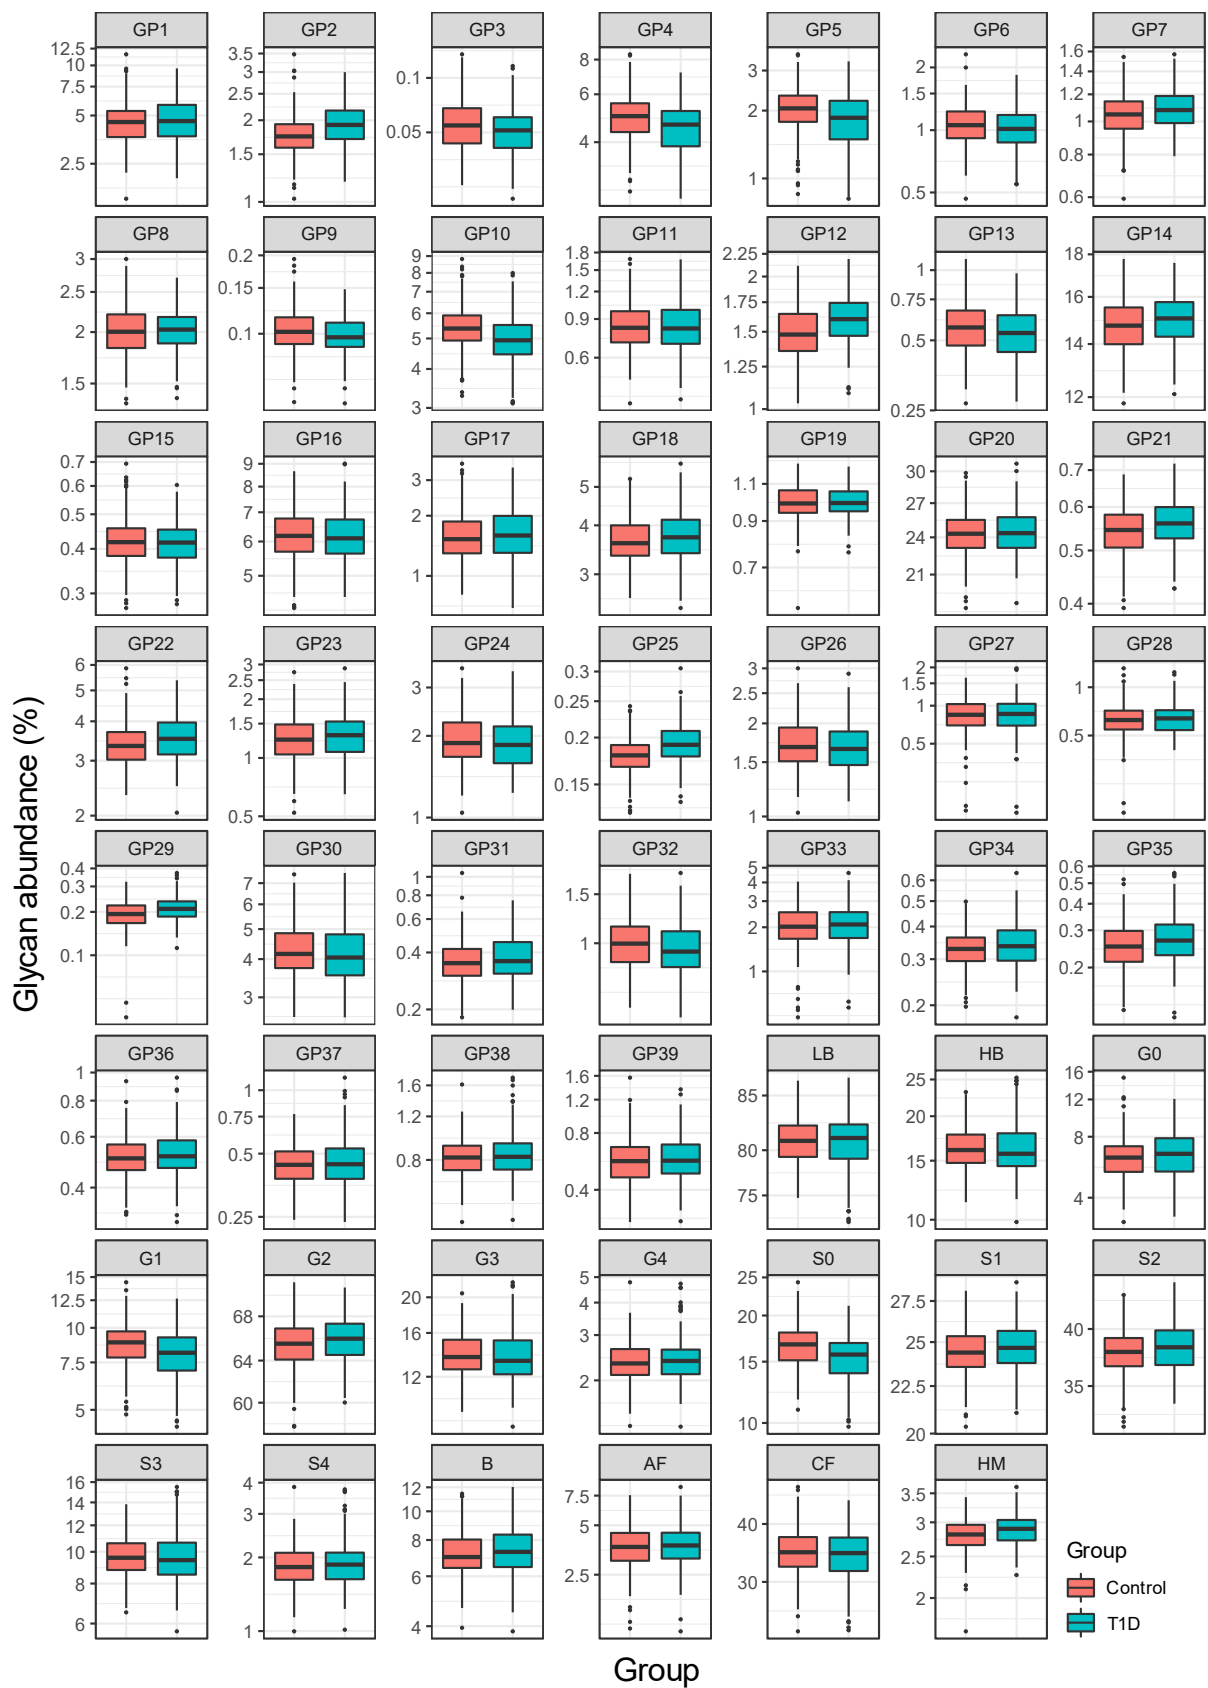

**ESM Fig. 1** Plasma *N*-glycan distributions across participants with type 1 diabetes and their unaffected siblings in the follow-up family-based study. GP, glycan peak; AF, glycans with antennary fucose; B, glycans with bisecting *N*-acetylglucosamine (GlcNAc); CF, glycans with core fucose; G0,



agalactosylated glycans; G1, monogalactosylated glycans; G2, digalactosylated glycans; G3, trigalactosylated glycans; G4, tetragalactosylated glycans; HB, highly branched glycans; HM, high-mannose glycans; LB, low branched glycans; S1, monosialylated glycans; S2, disialylated glycans; S3, trisialylated glycans; S4, tetrasialylated glycans

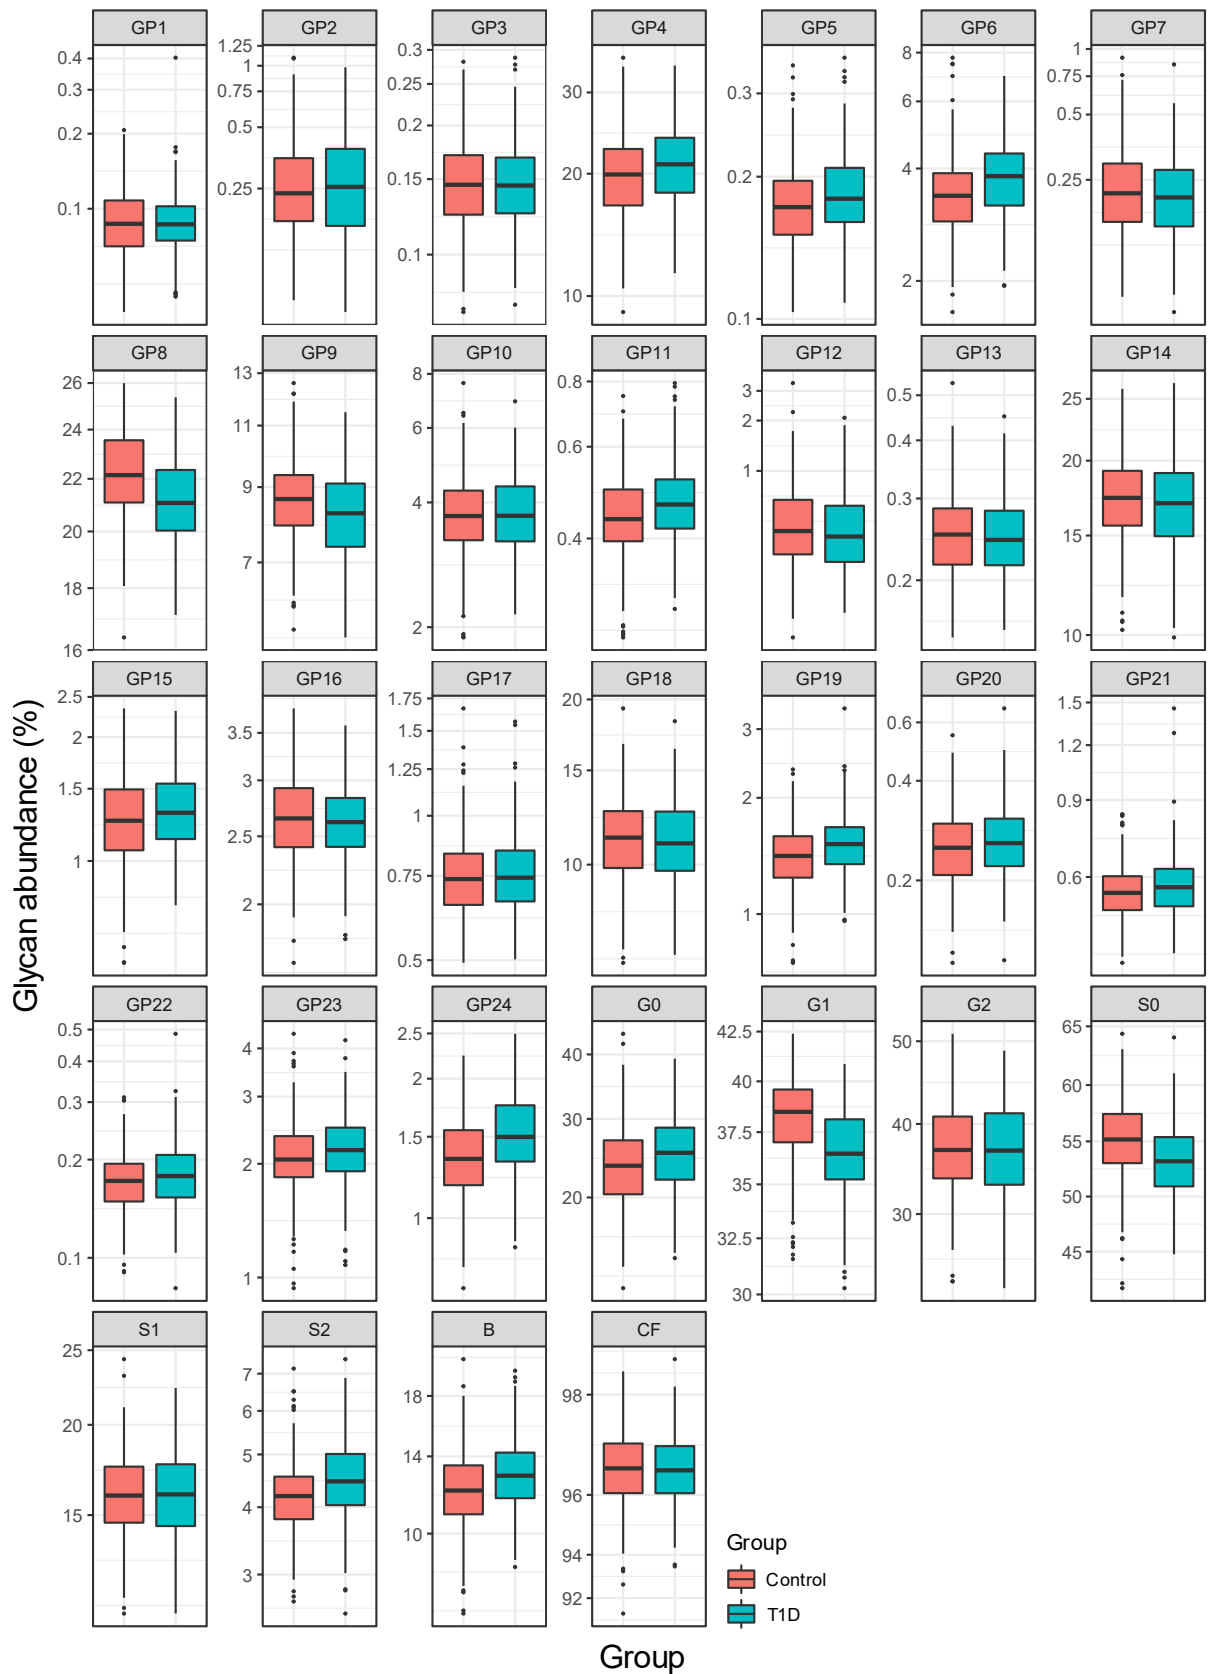

**ESM Fig. 2** IgG N-glycan distributions across participants with type 1 diabetes and their unaffected siblings in the follow-up family-based study. GP, glycan peak; G0, agalactosylated glycans; G1, monogalactosylated glycans; G2, digalactosylated glycans; S0, asialylated glycans; S1, monosialylated

glycans; S2, disialylated glycans; B, glycans with bisecting N-acetylglucosamine (GlcNAc); CF, glycans with core fucose; HM, high-mannose glycans

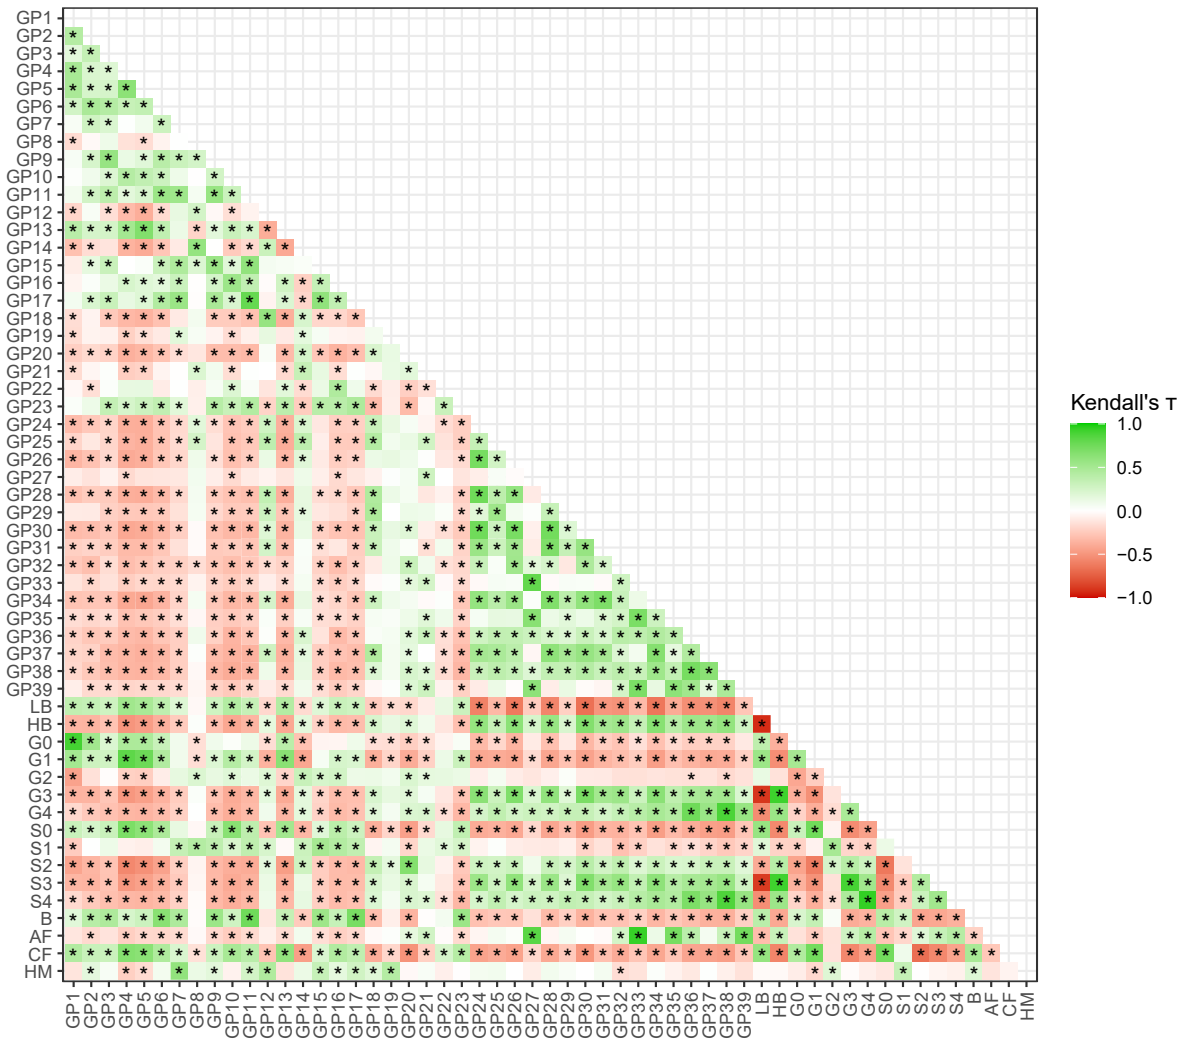

**ESM Fig. 3** Intercorrelation of the assessed plasma *N*-glycans across participants with type 1 diabetes from the follow-up family-based study. GP, glycan peak; LB, low branched glycans; HB, highly branched glycans; G0, agalactosylated glycans; G1, monogalactosylated glycans; G2, digalactosylated glycans; G3, trigalactosylated glycans; G4, tetragalactosylated glycans; S1, monosialylated glycans; S2, disialylated glycans; S3, trisialylated glycans; S4, tetrasialylated glycans; B, glycans with bisecting *N*-acetylglucosamine (GlcNAc); AF, glycans with antennary fucose; CF, glycans with core fucose; HM, high-mannose glycans

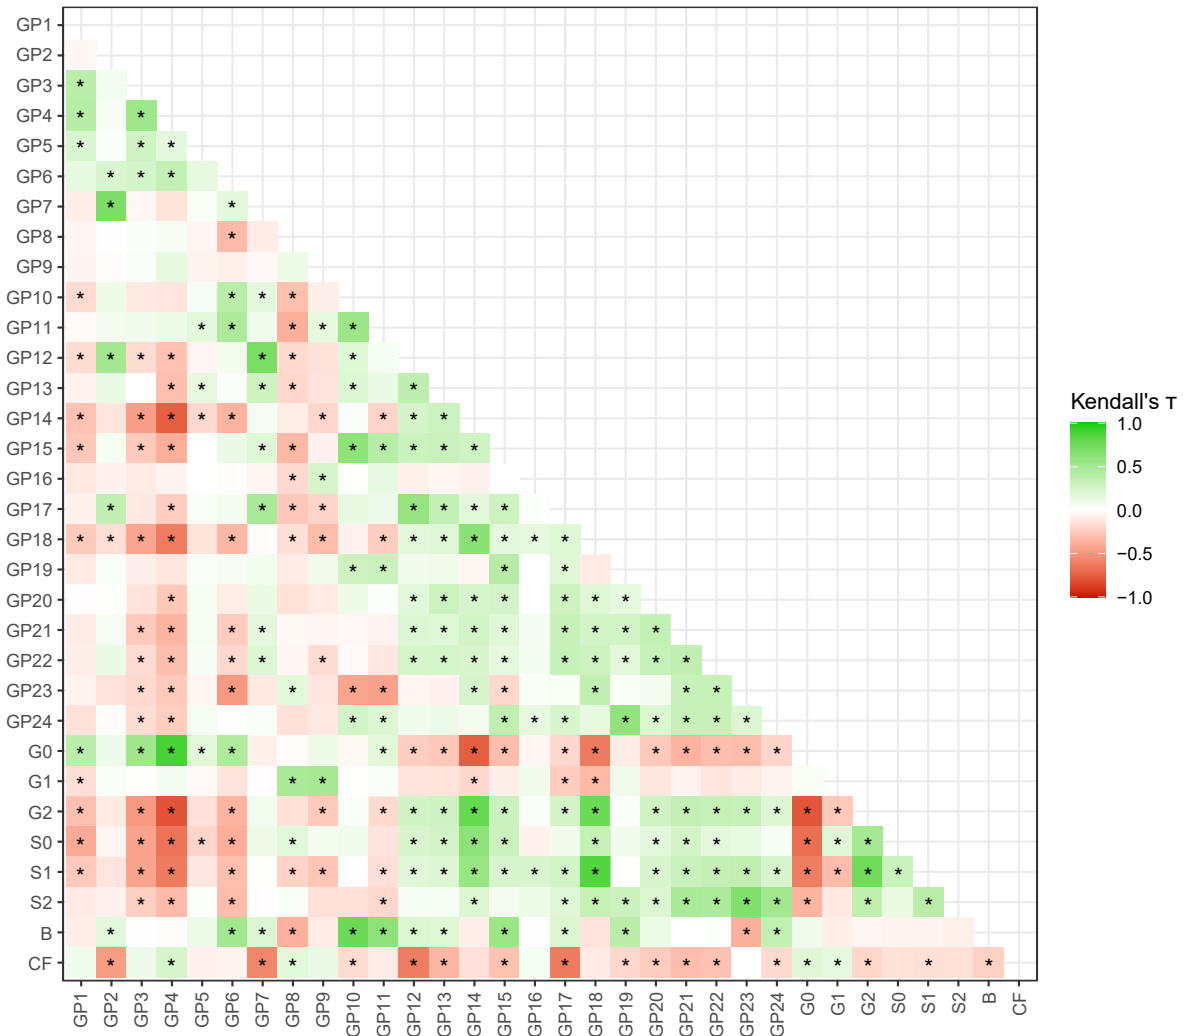

**ESM Fig. 4** Intercorrelation of the assessed IgG N-glycans across participants with type 1 diabetes from the follow-up family-based study. GP, glycan peak; G0, agalactosylated glycans; G1, monogalactosylated glycans; G2, digalactosylated glycans; S0, asialylated glycans; S1, monosialylated glycans; S2, disialylated glycans; B, glycans with bisecting N-acetylglucosamine (GlcNAc); CF, glycans with core fucose; HM, high-mannose glycans

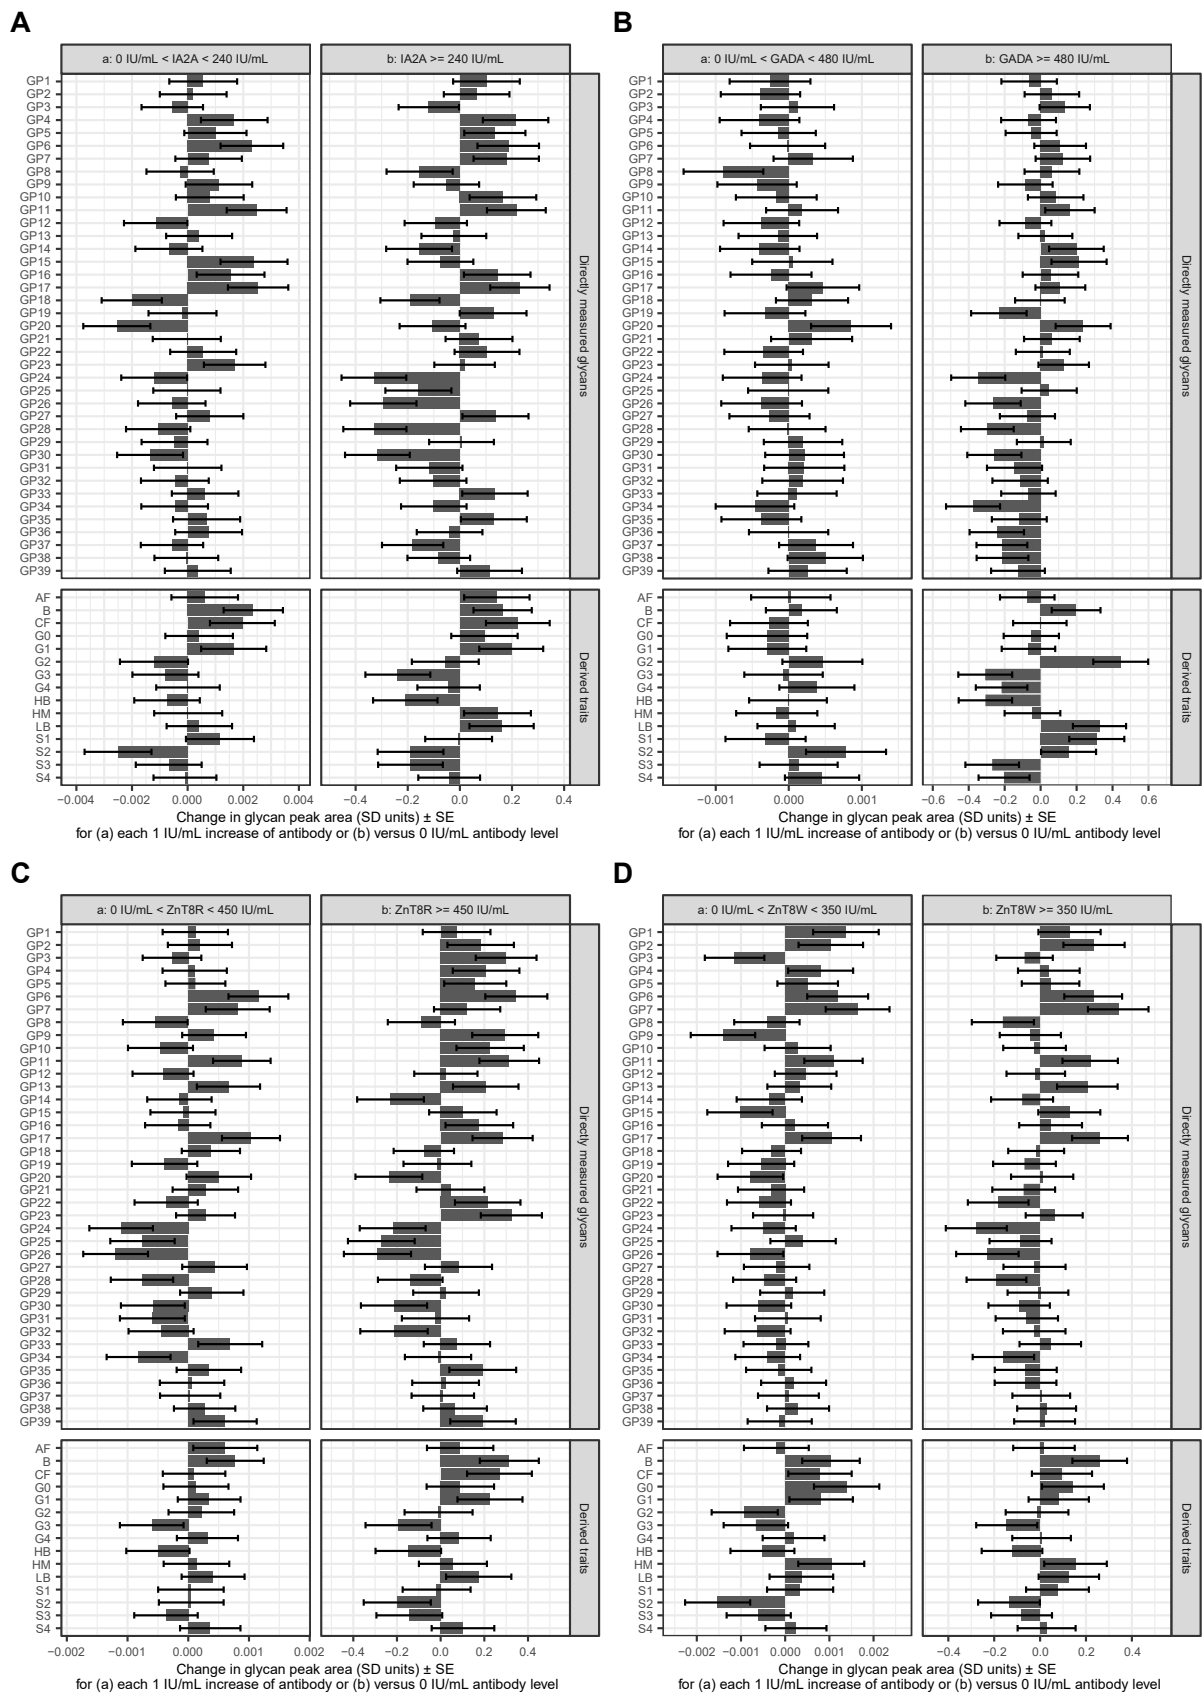

**ESM Fig. 5** Associations between plasma *N*-glycans and (A) IA-2A, insulinoma-associated protein 2 autoantibodies; (B) GADA, glutamic acid decarboxylase autoantibodies; (C) ZnT8RA, arginine zinc transporter 8 autoantibodies; (D) ZnT8WA, tryptophan zinc transporter 8 autoantibodies. No

significant associations were observed. LB, low branched glycans; HB, highly branched glycans; G0, agalactosylated glycans; G1, monogalactosylated glycans; G2, digalactosylated glycans; G3, trigalactosylated glycans; G4, tetragalactosylated glycans; S1, monosialylated glycans; S2, disialylated glycans; S3, trisialylated glycans; S4, tetrasialylated glycans; B, glycans with bisecting *N*-acetylglucosamine (GlcNAc); AF, glycans with antennary fucose; CF, glycans with core fucose; HM, high-mannose glycans

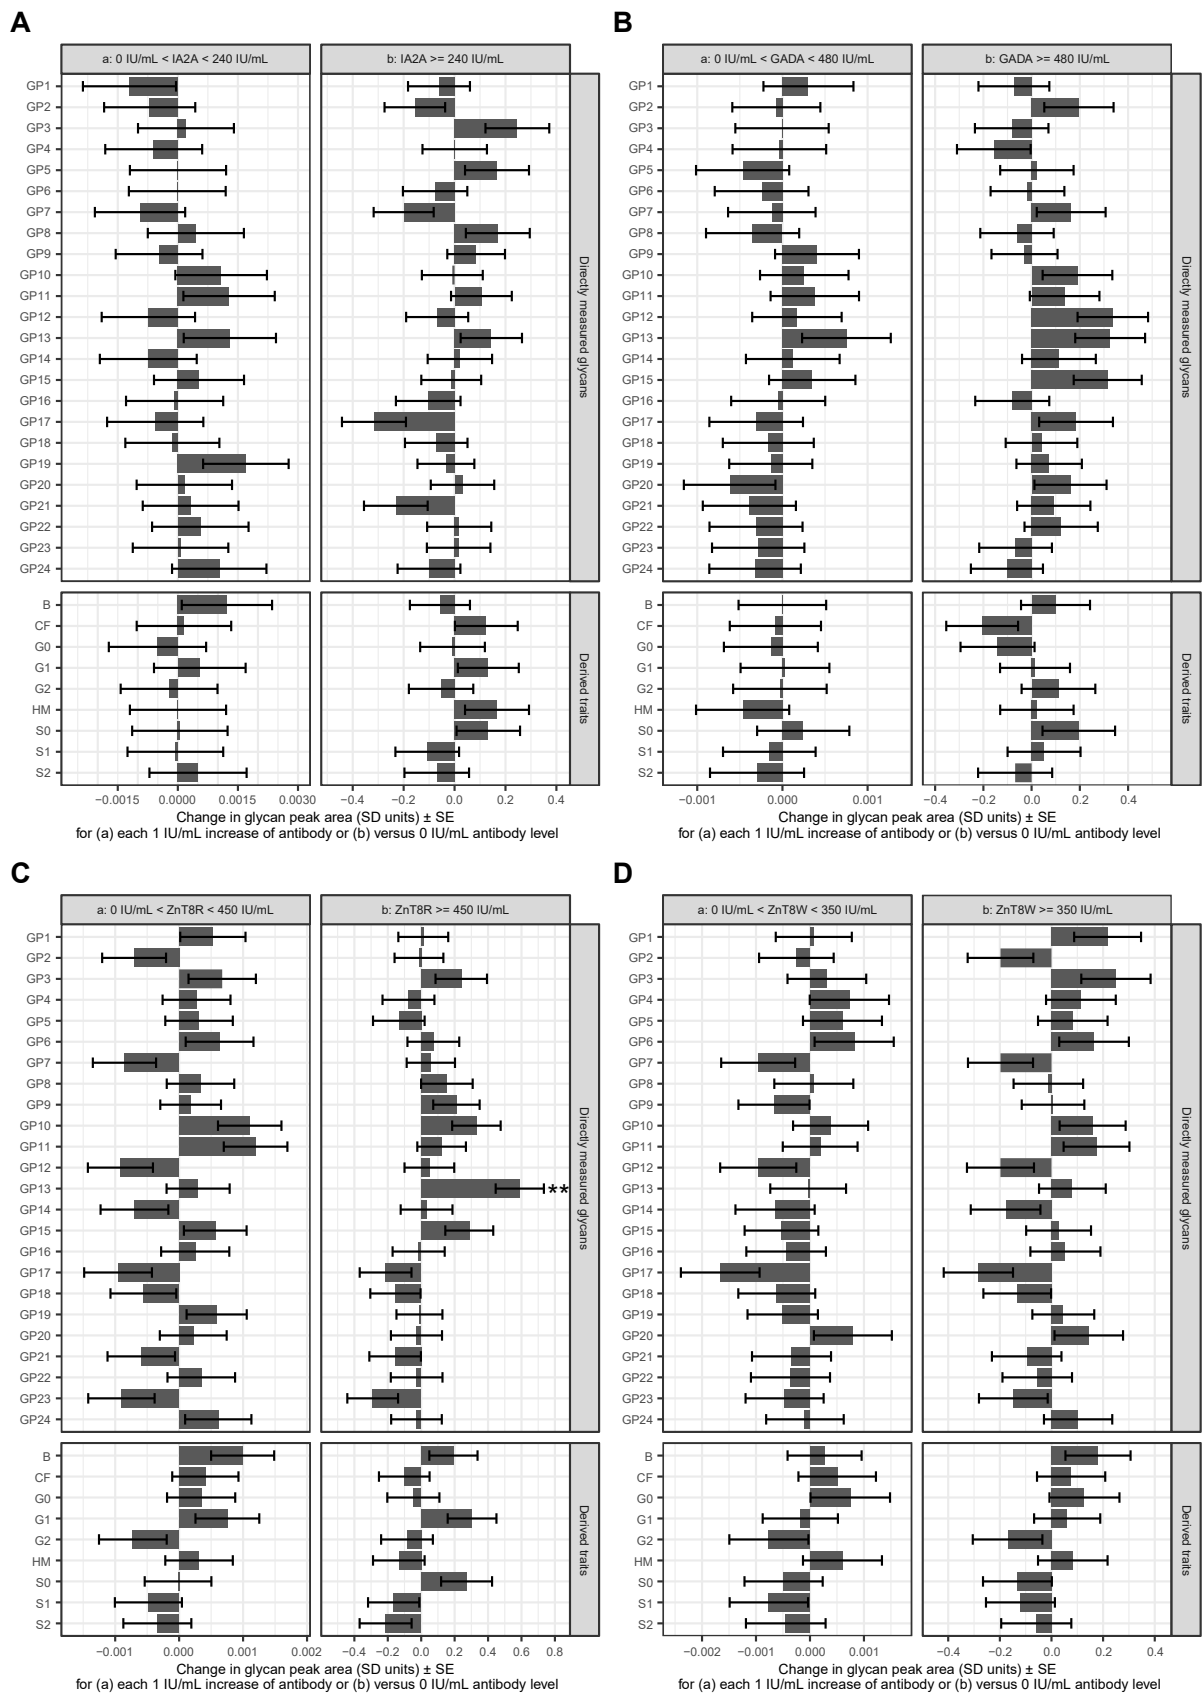

**ESM Fig. 6** Associations between IgG N-glycans and (A) IA-2A, insulinoma-associated protein 2 autoantibodies; (B) GADA, glutamic acid decarboxylase autoantibodies; (C) ZnT8RA, arginine zinc transporter 8 autoantibodies; (D) ZnT8WA, tryptophan zinc transporter 8 autoantibodies. Significant

associations are represented with a star sign. G0, agalactosylated glycans; G1, monogalactosylated glycans; G2, digalactosylated glycans; S0, asialylated glycans; S1, monosialylated glycans; S2, disialylated glycans; B, glycans with bisecting N-acetylglucosamine (GlcNAc); CF, glycans with core fucose; HM, high-mannose glycans

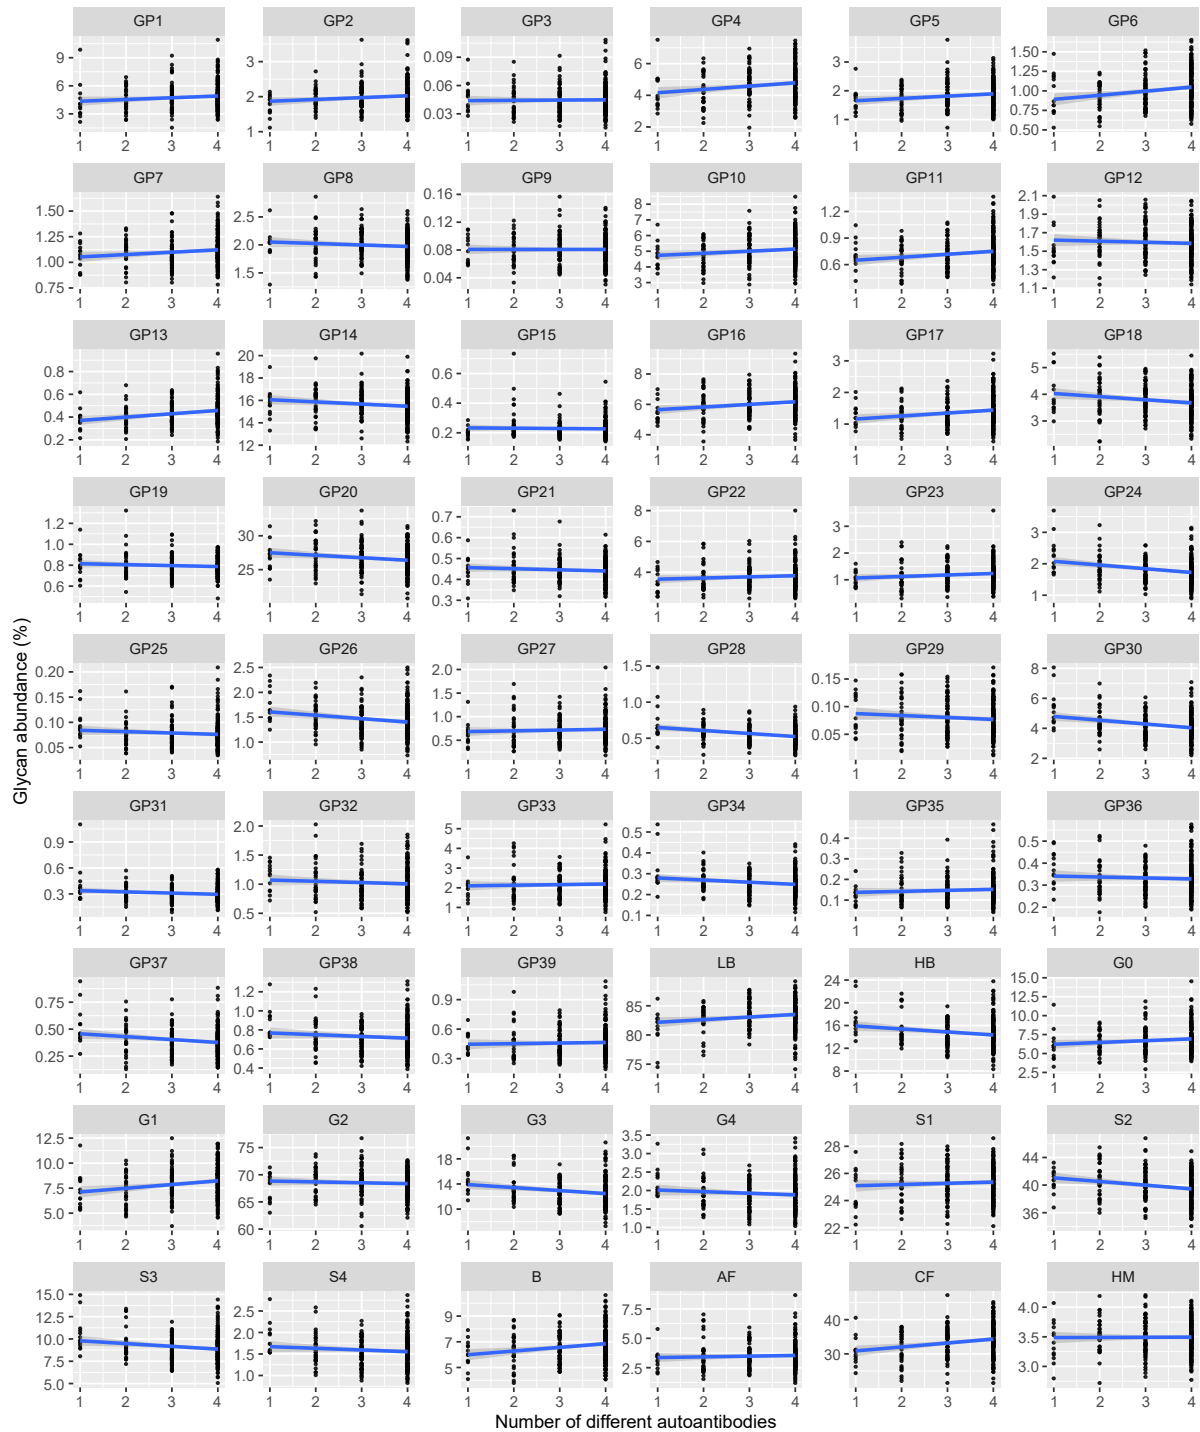

**ESM Fig. 7** Correlation of plasma *N*-glycans with increase in number of specific autoantibodies. Significant correlations were observed for GP30, GP24, GP28, GP37, G3, HB, and S3. LB, low branched glycans; HB, highly branched glycans; G0, agalactosylated glycans; G1, monogalactosylated



glycans; G2, digalactosylated glycans; G3, trigalactosylated glycans; G4, tetragalactosylated glycans; S1, monosialylated glycans; S2, disialylated glycans; S3, trisialylated glycans; S4, tetrasialylated glycans; B, glycans with bisecting N-acetylglucosamine (GlcNAc); AF, glycans with antennary fucose; CF, glycans with core fucose; HM, high-mannose glycans

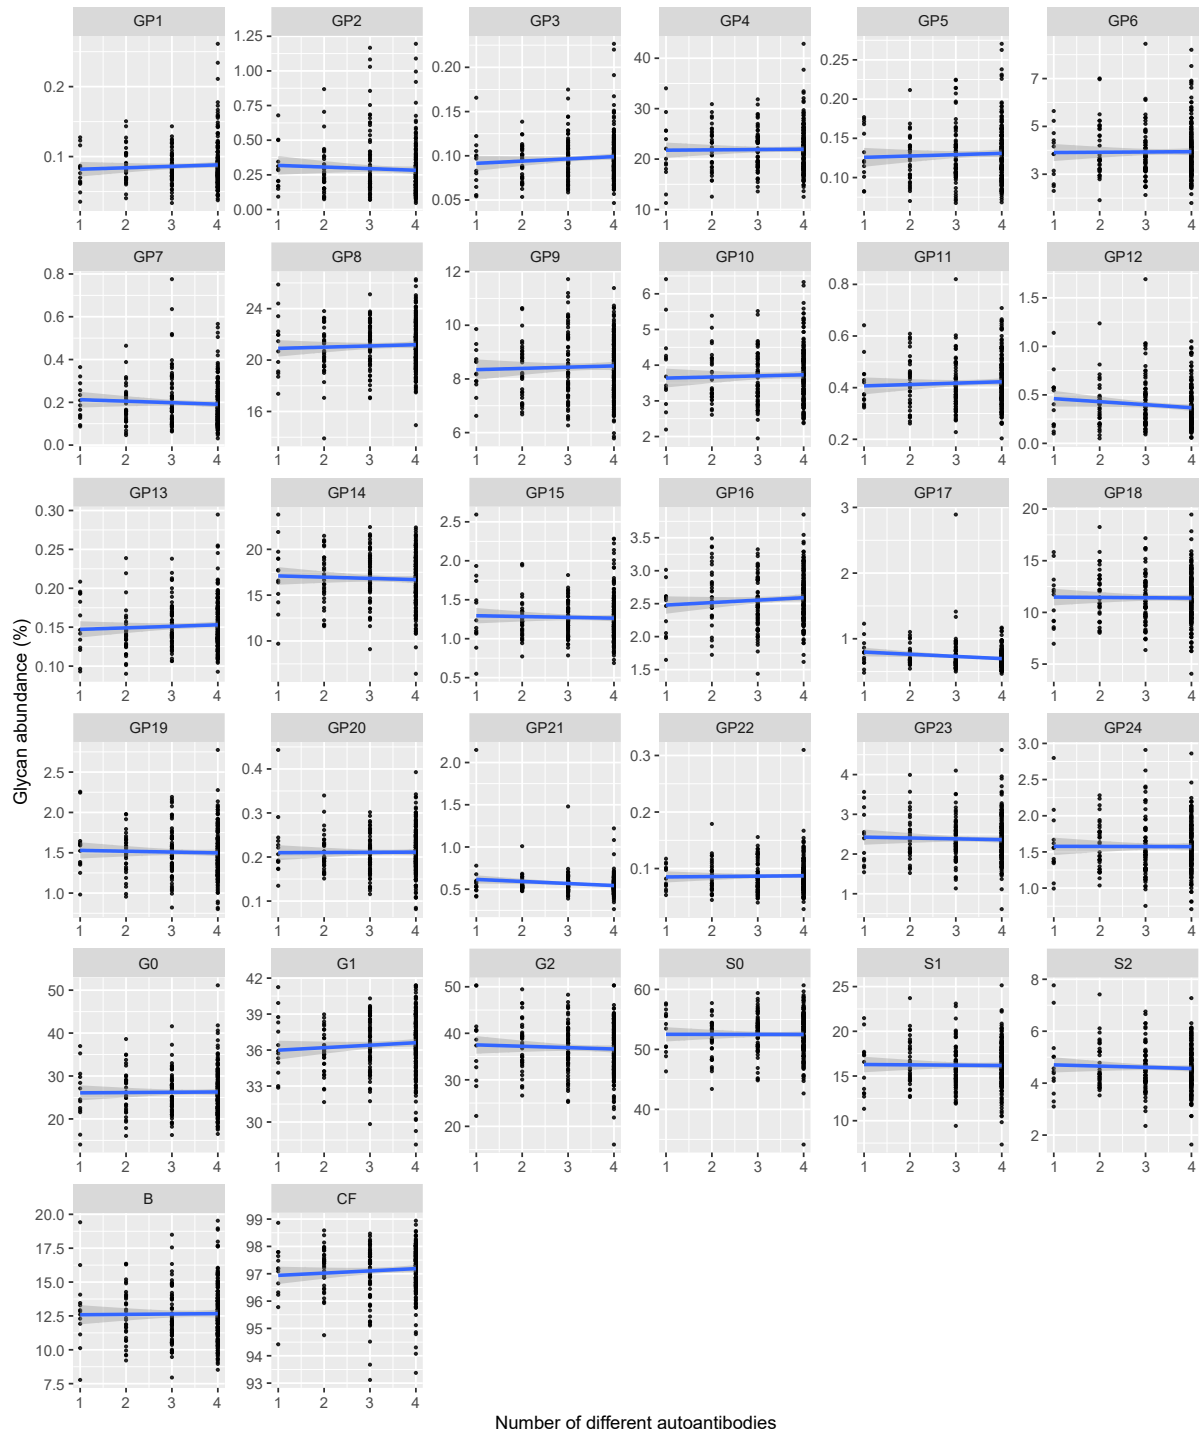

**ESM Fig. 8** Correlation of IgG N-glycans with increase in number of specific autoantibodies. No significant correlations were observed. G0, agalactosylated glycans; G1, monogalactosylated glycans; G2, digalactosylated glycans; S0, asialylated glycans; S1, monosialylated glycans; S2, disialylated glycans; B, glycans with bisecting N-acetylglucosamine (GlcNAc); CF, glycans with core fucose; HM, high-mannose glycans

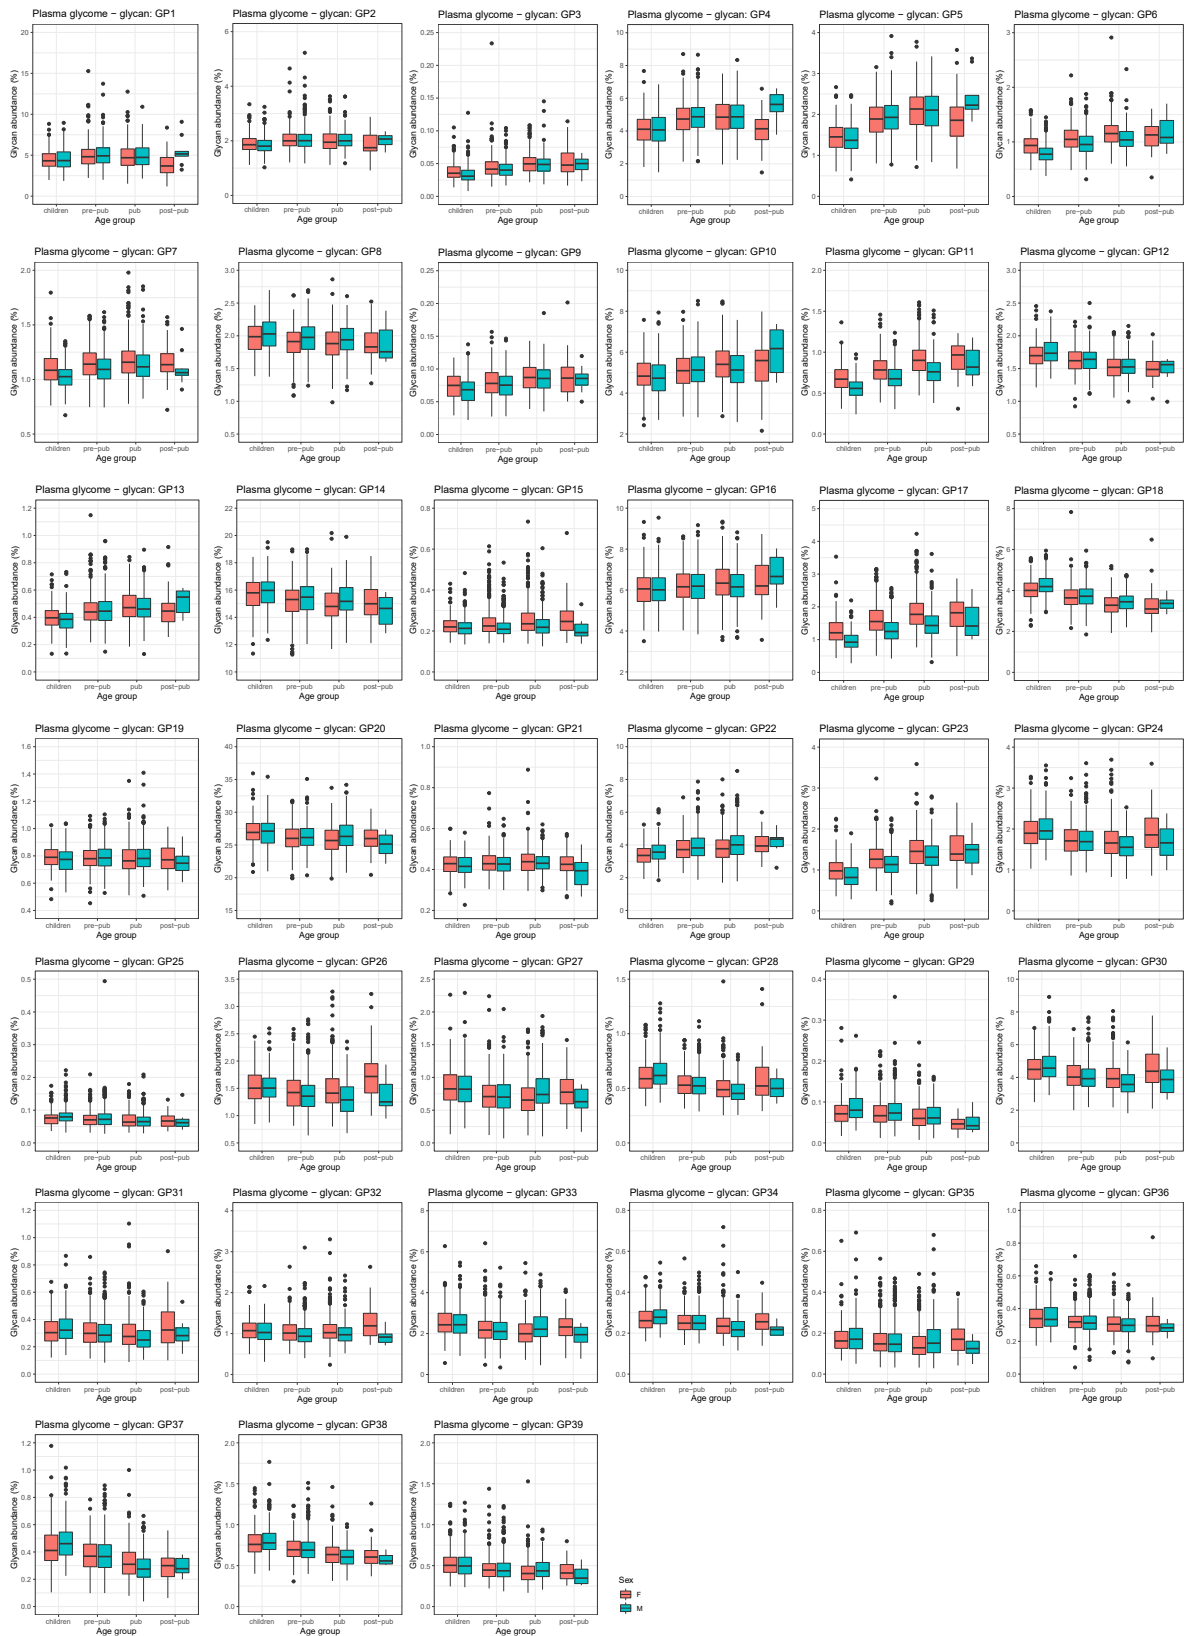

**ESM Fig. 9** Proportions of directly measured plasma *N*-glycans in groups comprising male and female children with various ages at diagnosis of type 1 diabetes. Children, age 0.6-6 years; Pre-pub, pre-pubertal children, age 6-11/13 years; Pub, pubertal children, age 11/13-15/16.9 years; Post-pub, post-pubertal children, age 15/17-19.1/18.3 years; F, female; M, male

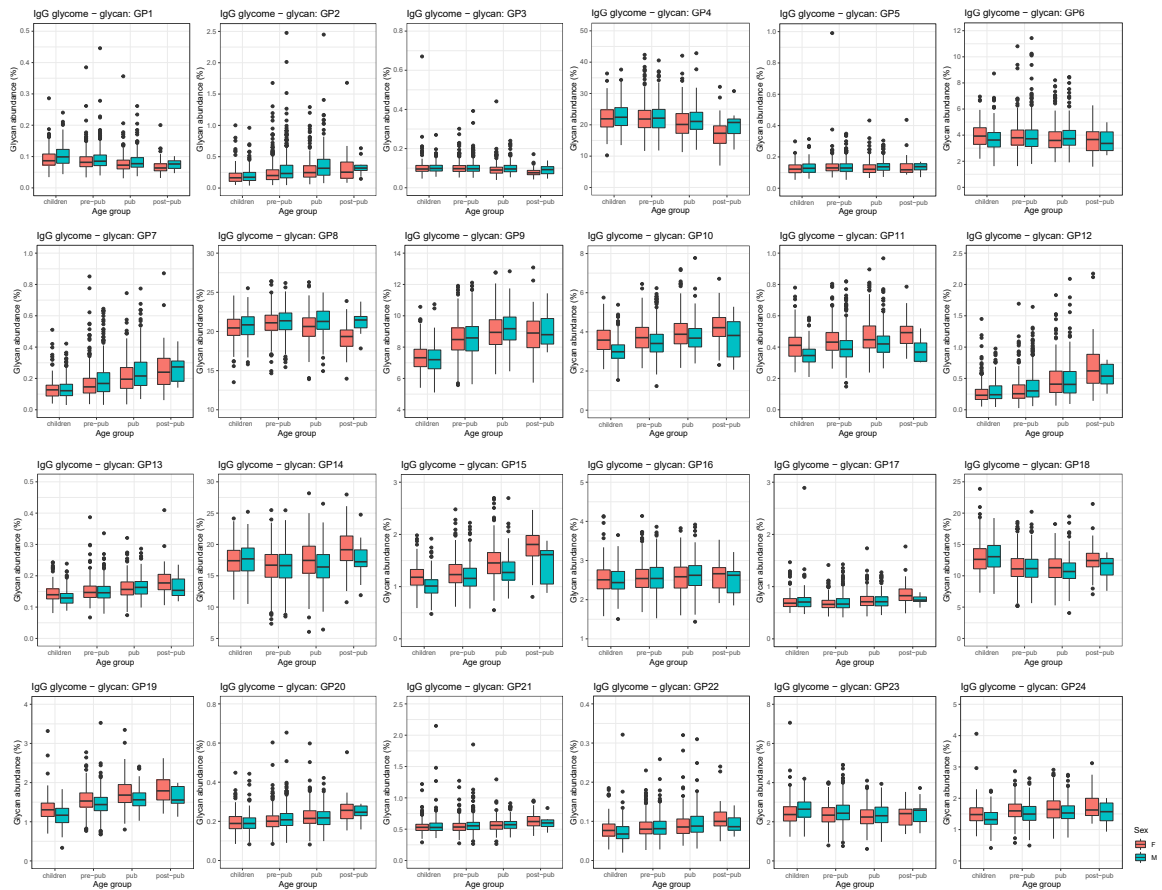

**ESM Fig. 10** Proportions of directly measured IgG *N*-glycans in groups comprising male and female children with various ages at diagnosis of type 1 diabetes. Children, age 0.6-6 years; Pre-pub, pre-pubertal children, age 6 to 11/13 years; Pub, pubertal children, age 11/13-15/16.9 years; Post-pub, post-pubertal children, age 15/17-19.1/18.3 years; F, female; M, male

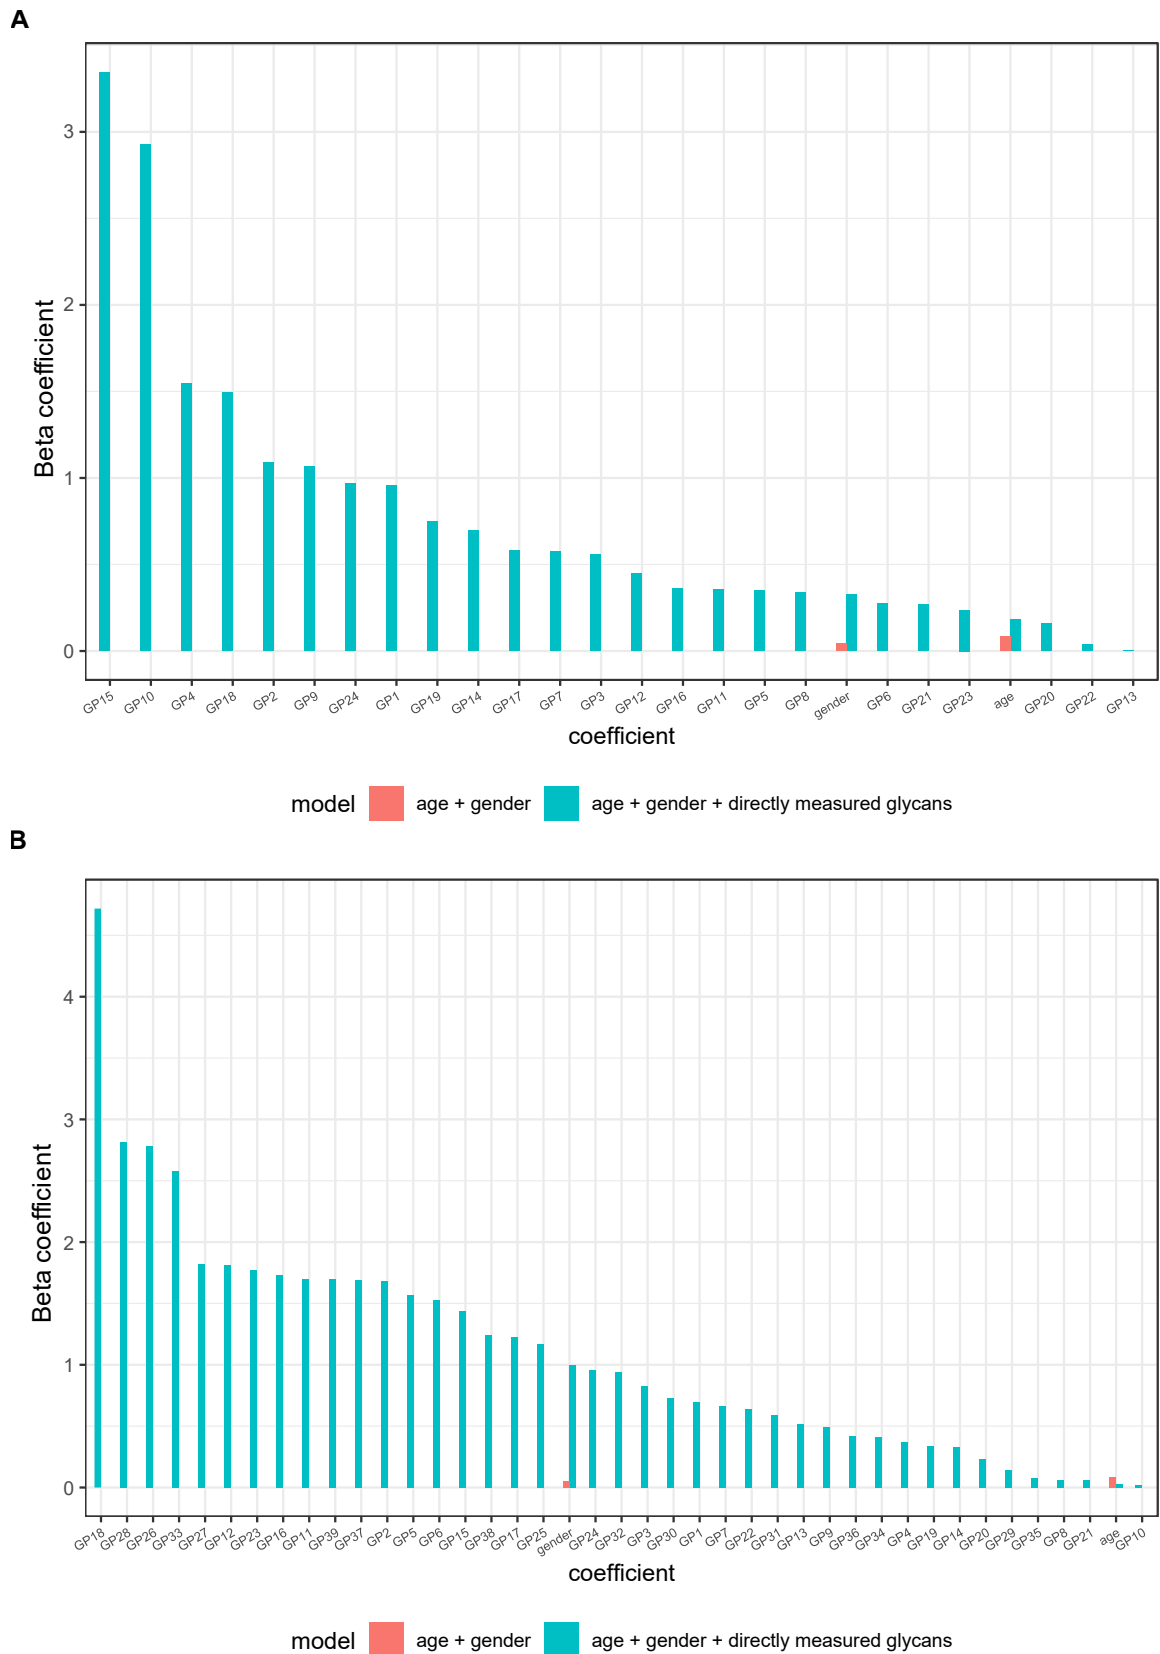

**ESM Fig. 11** Classification performance of each individual IgG (A) and plasma (B) N-glycan trait in predicting disease status of patients with type 1 diabetes and healthy controls evaluated by the receiver operating characteristic curves analyses
